# Supplementary material
Source: PubMed Central journal article supplement (PMC10529989)

# Uncropped Blots/Gels

Bayer et al Circ. Research 2022

# Figure 2F Part 1:

MyD88 +/+    -/-

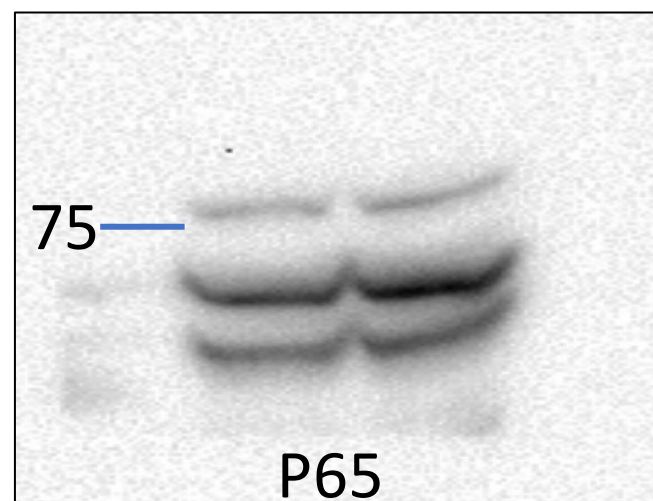

MyD88 +/+    -/-

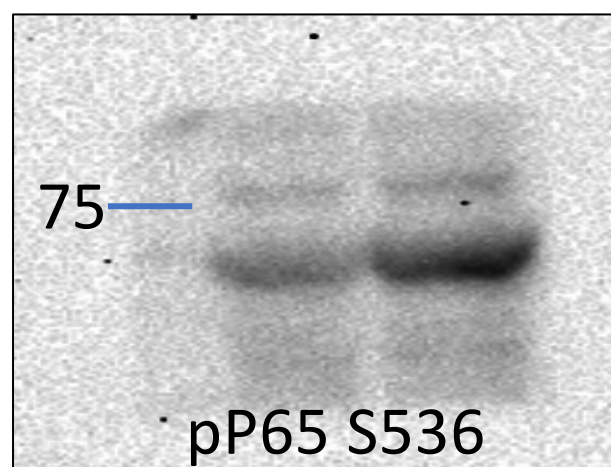

MyD88 +/+    -/-

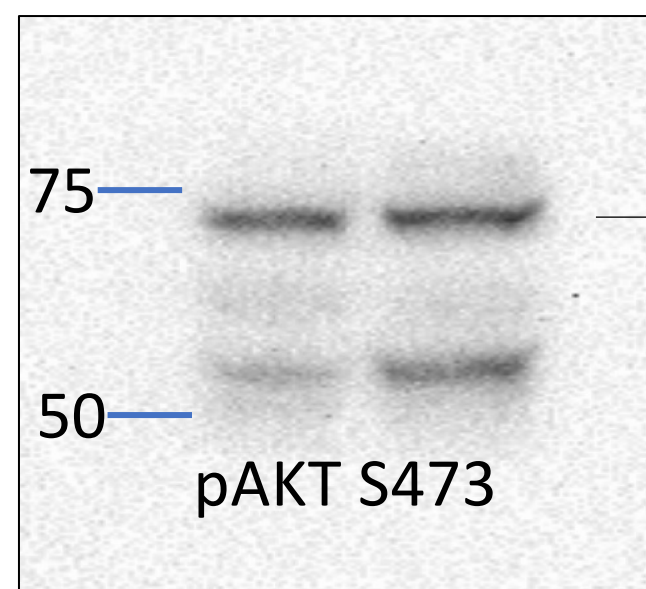

MyD88 +/+    -/-

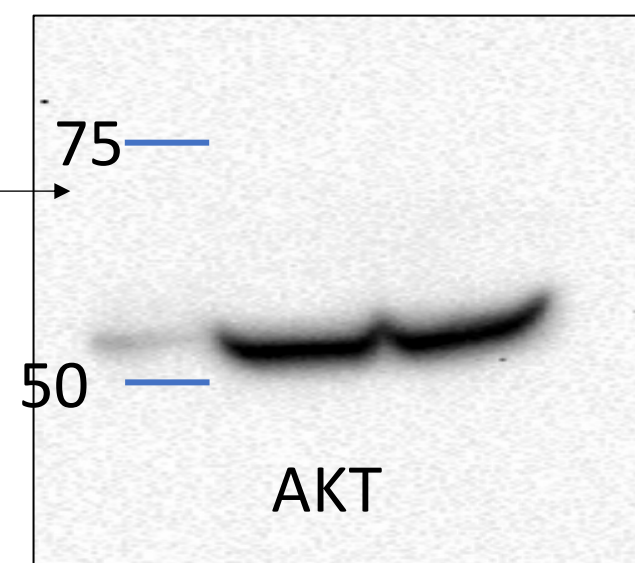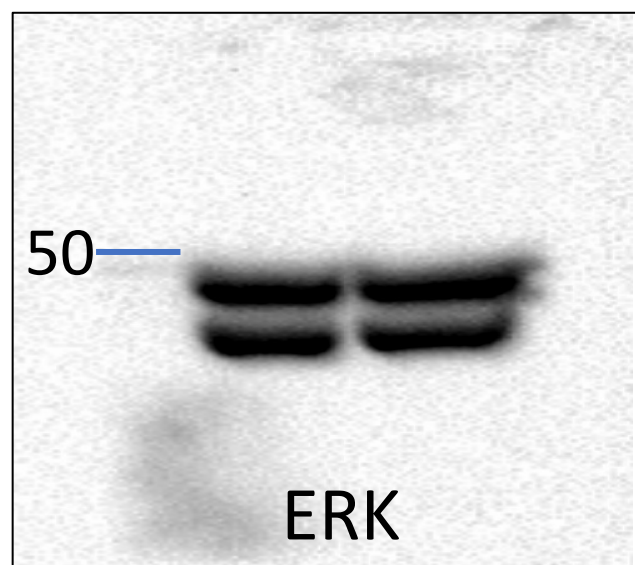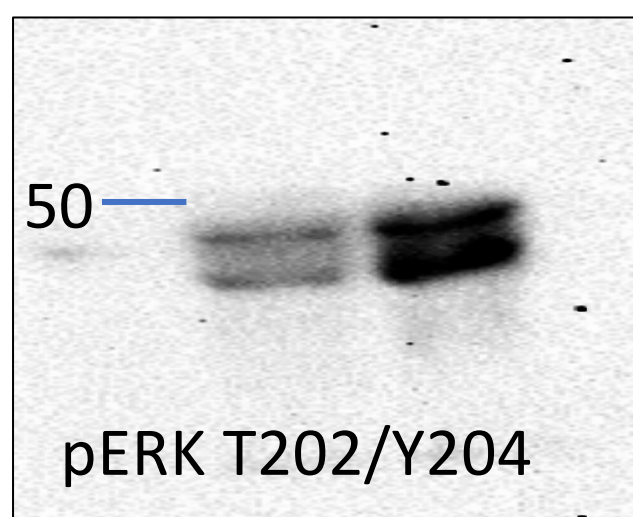

*Both blots were trimmed to ladder + 2 lanes, and cut above 37 kDa and at 50 kDa as shown*

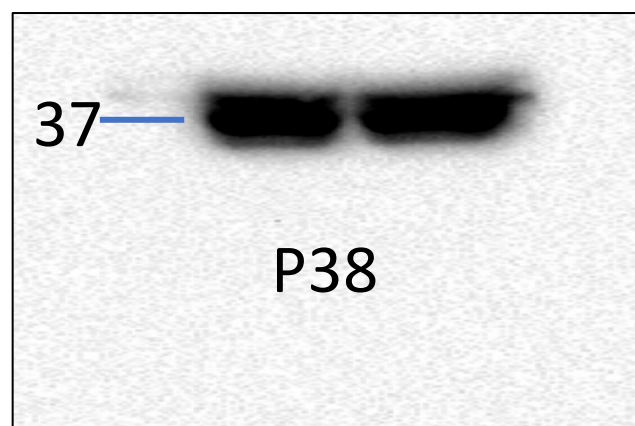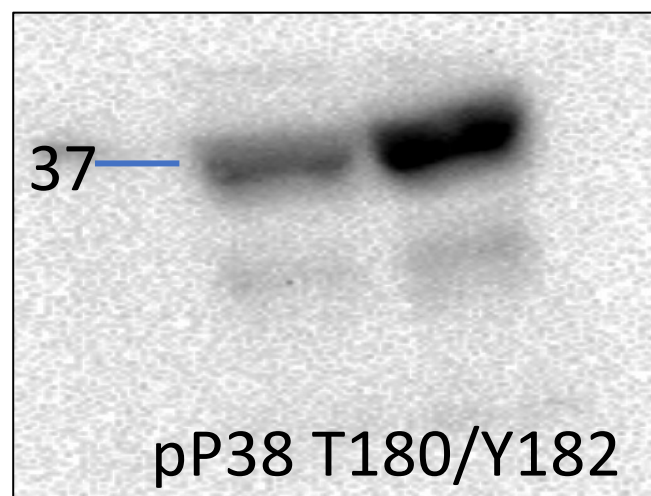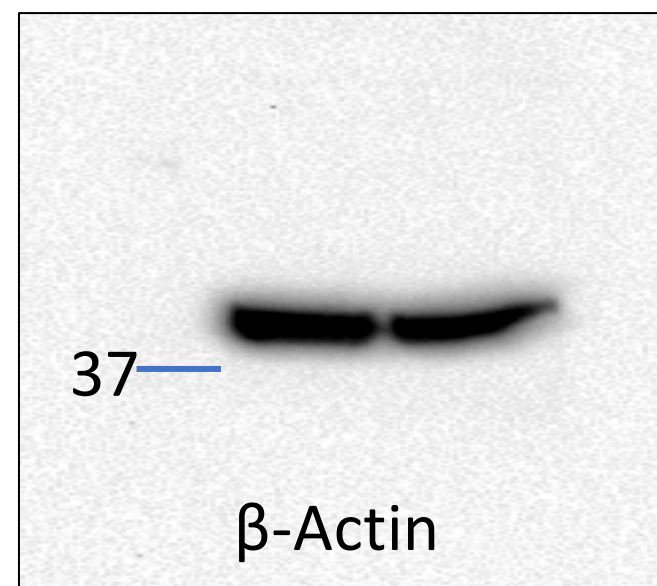

*Blot was cut at 50 kDa*

**Figure 2F cont:**

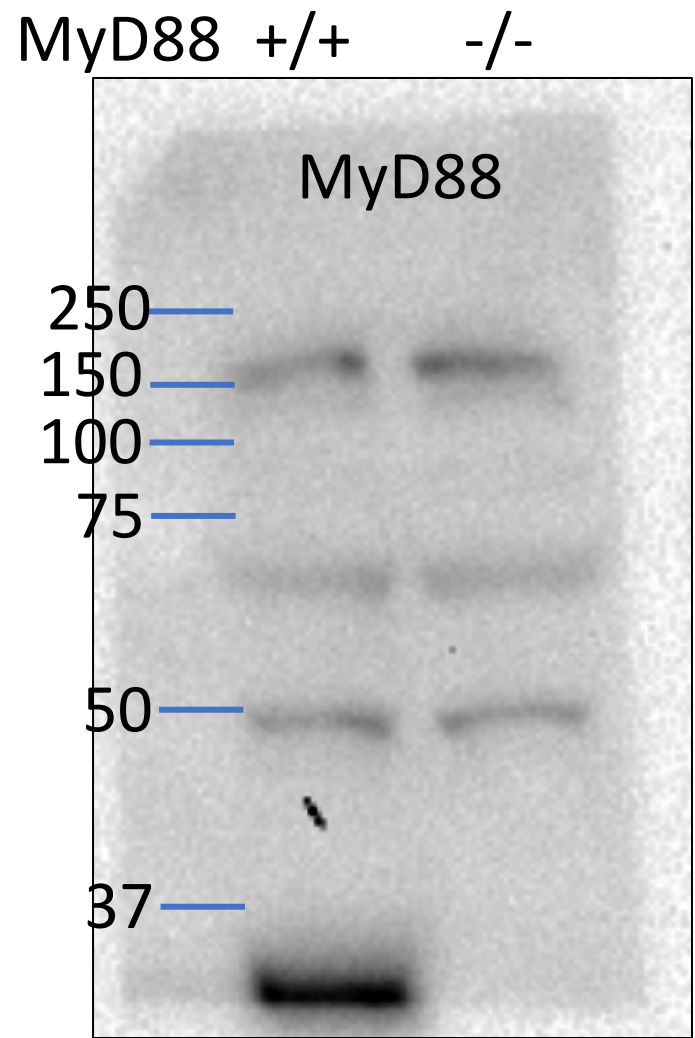

**Figure 2H:**

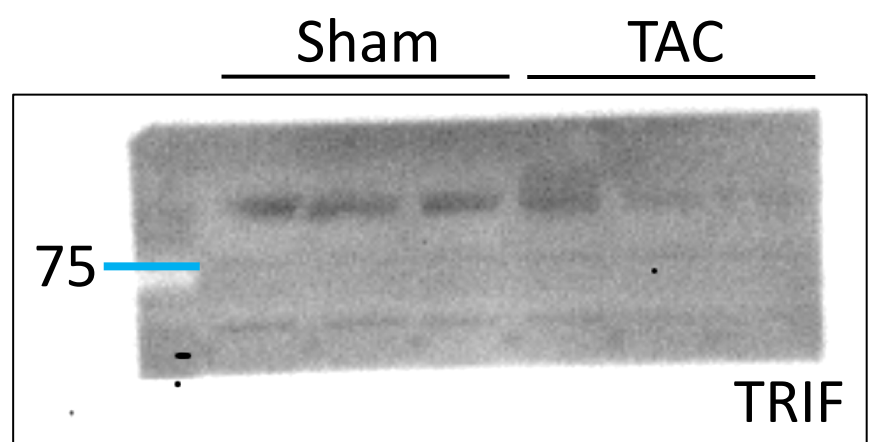

*Blot was cut between 50 and 75 kDa*

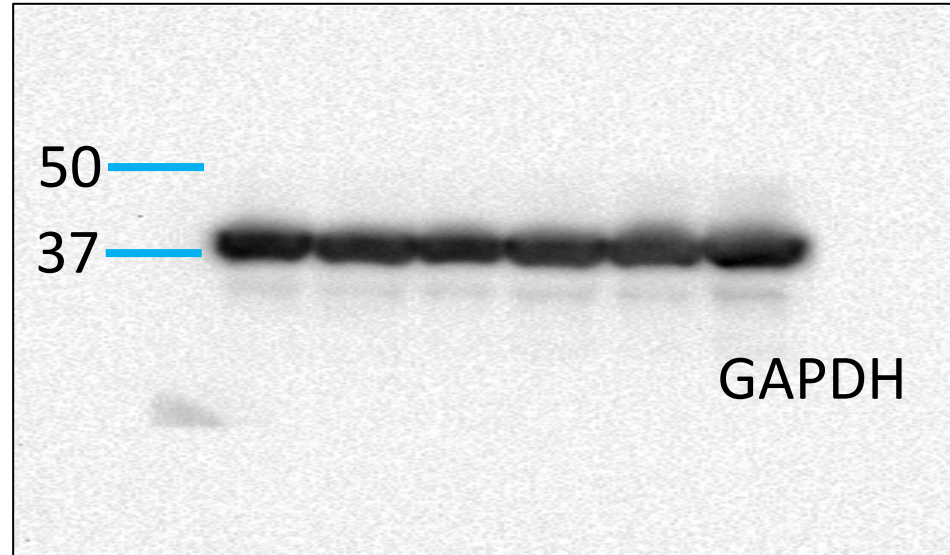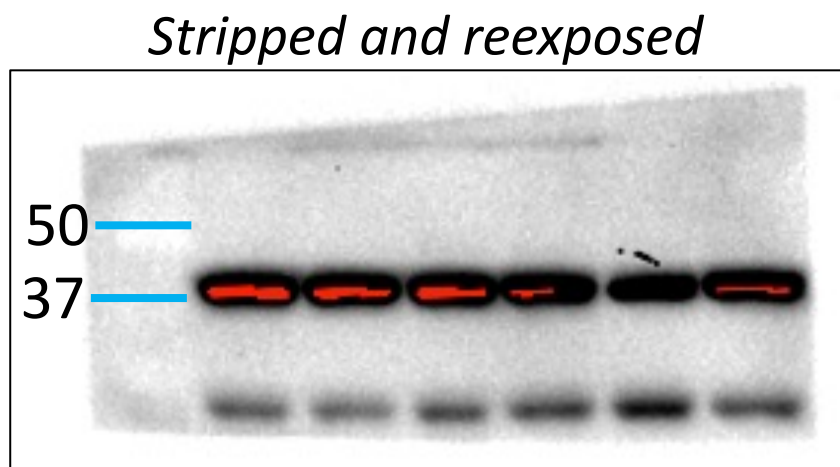

Unstripped GAPDH

MyD88



**Figure 4B:**

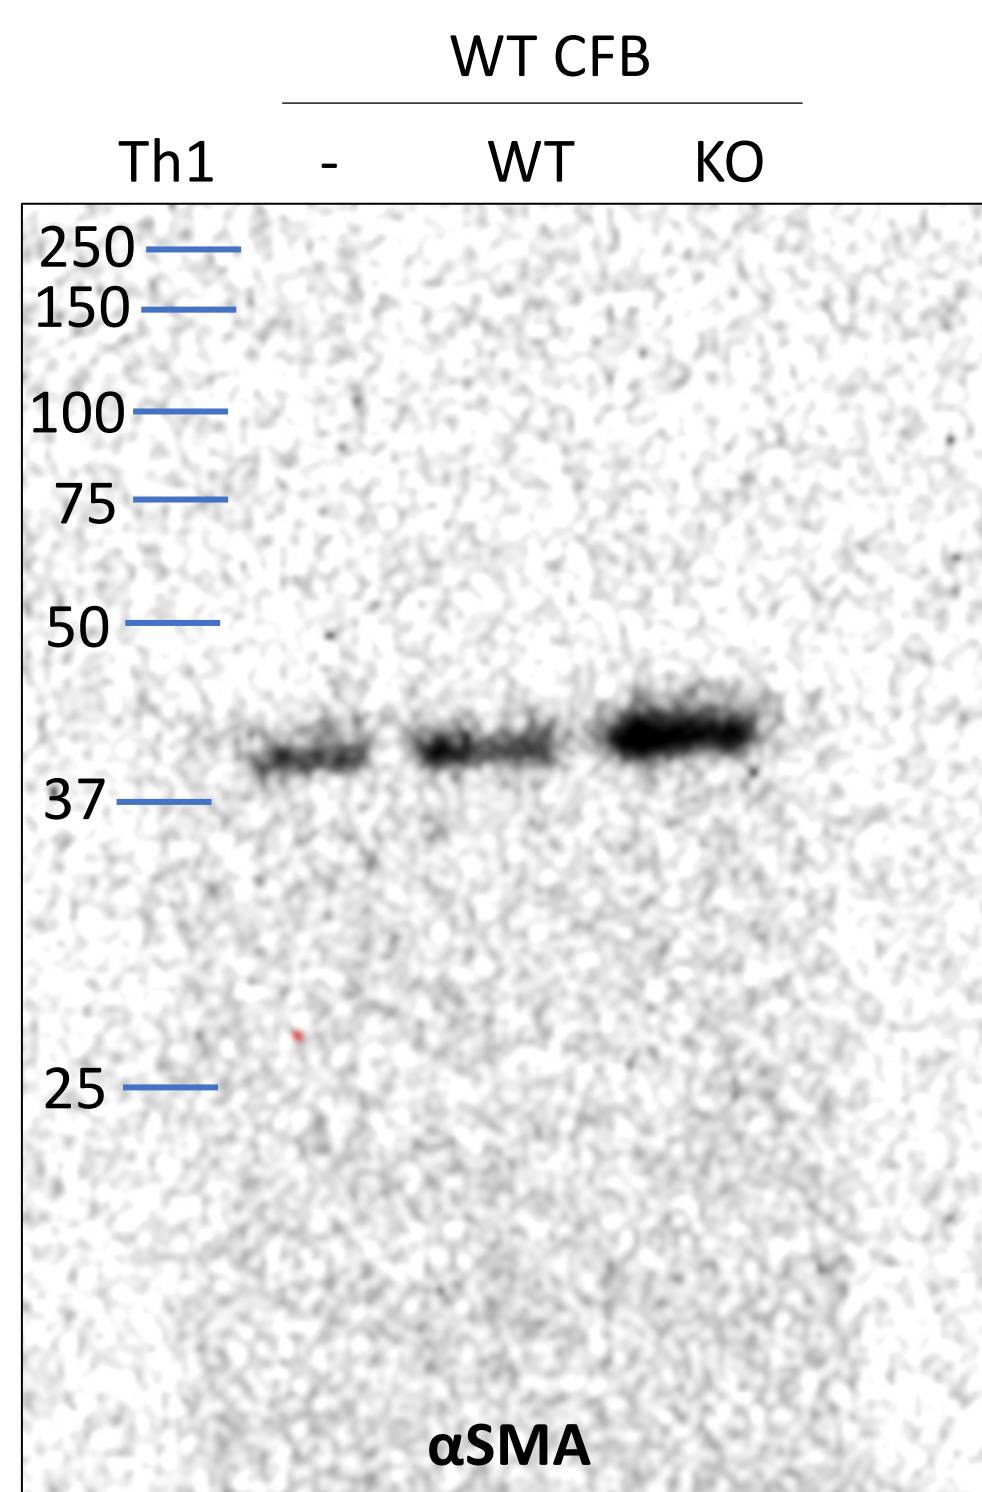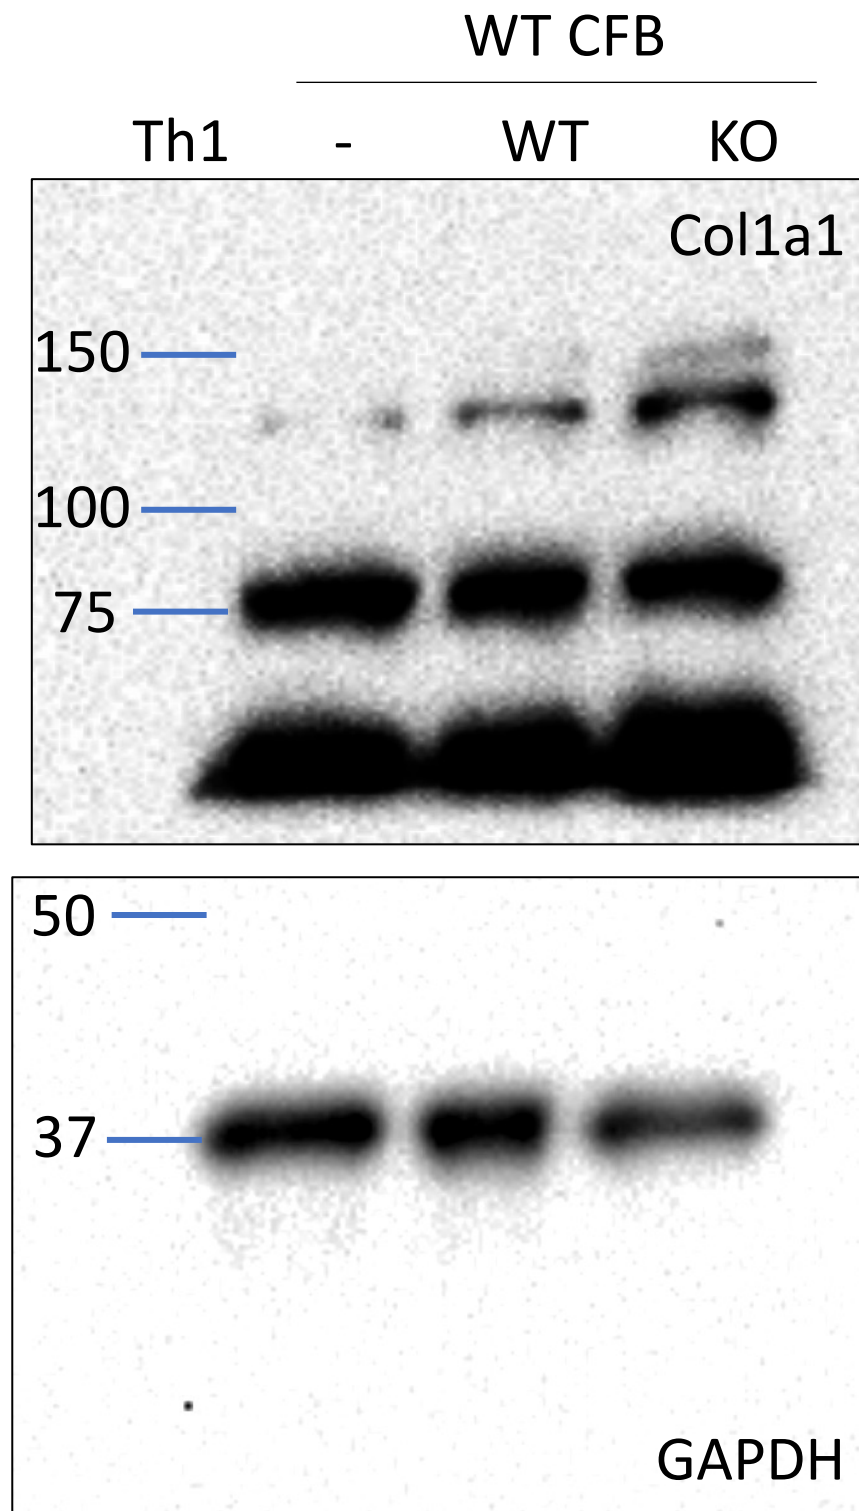

*Blot was cut around 50 kDa*

**Figure 5F**

MyD88      Naïve      Th1  
              +/+ -/-      +/+ -/-

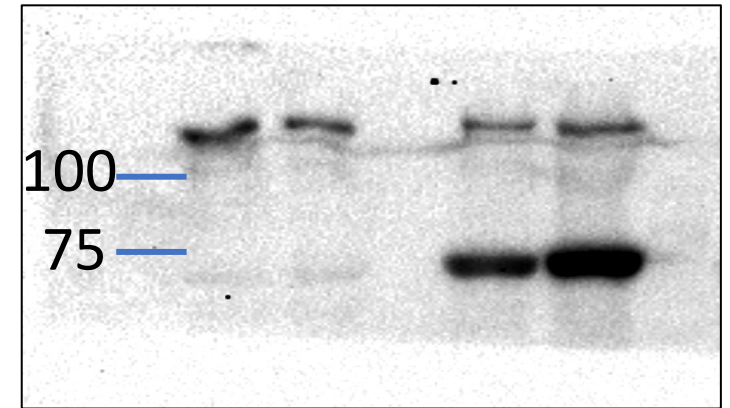

*Blot was cut ~50 kDa*

pZAP70

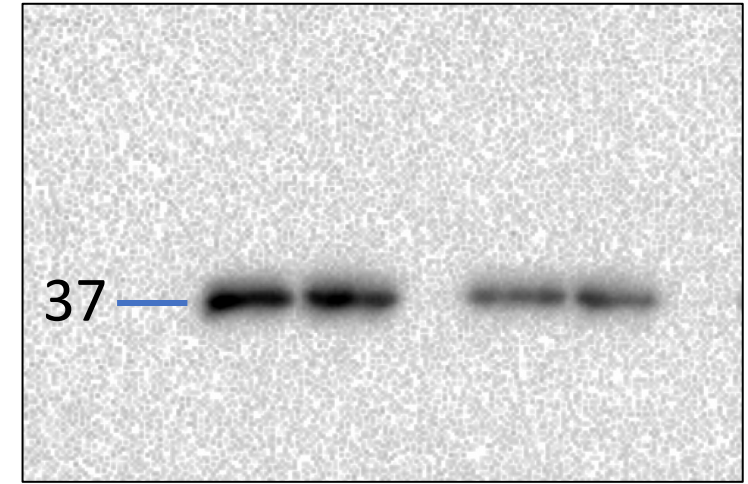

GAPDH

MyD88      Naïve      Th1  
              +/+ -/-      +/+ -/-

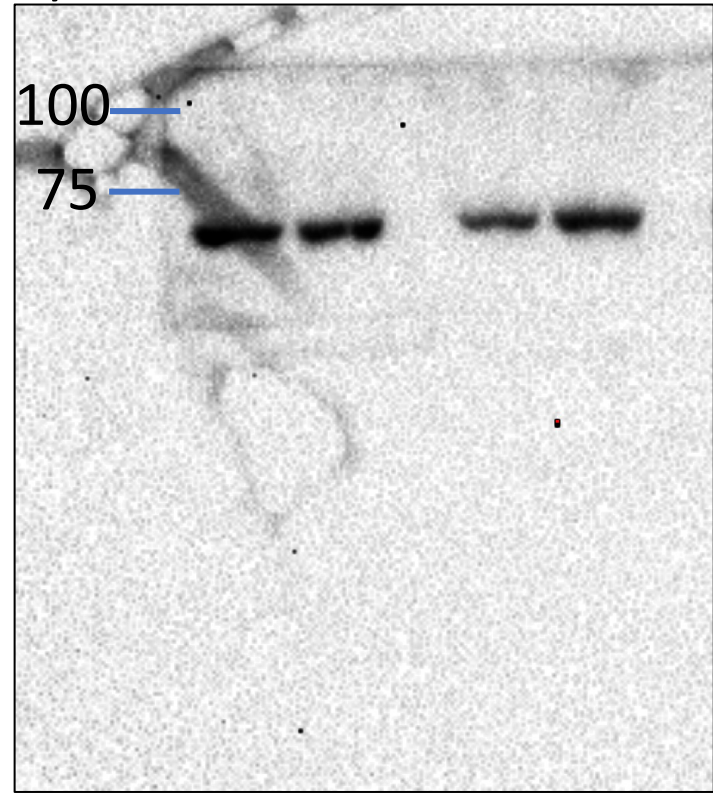

ZAP70

**Figure 5L:**

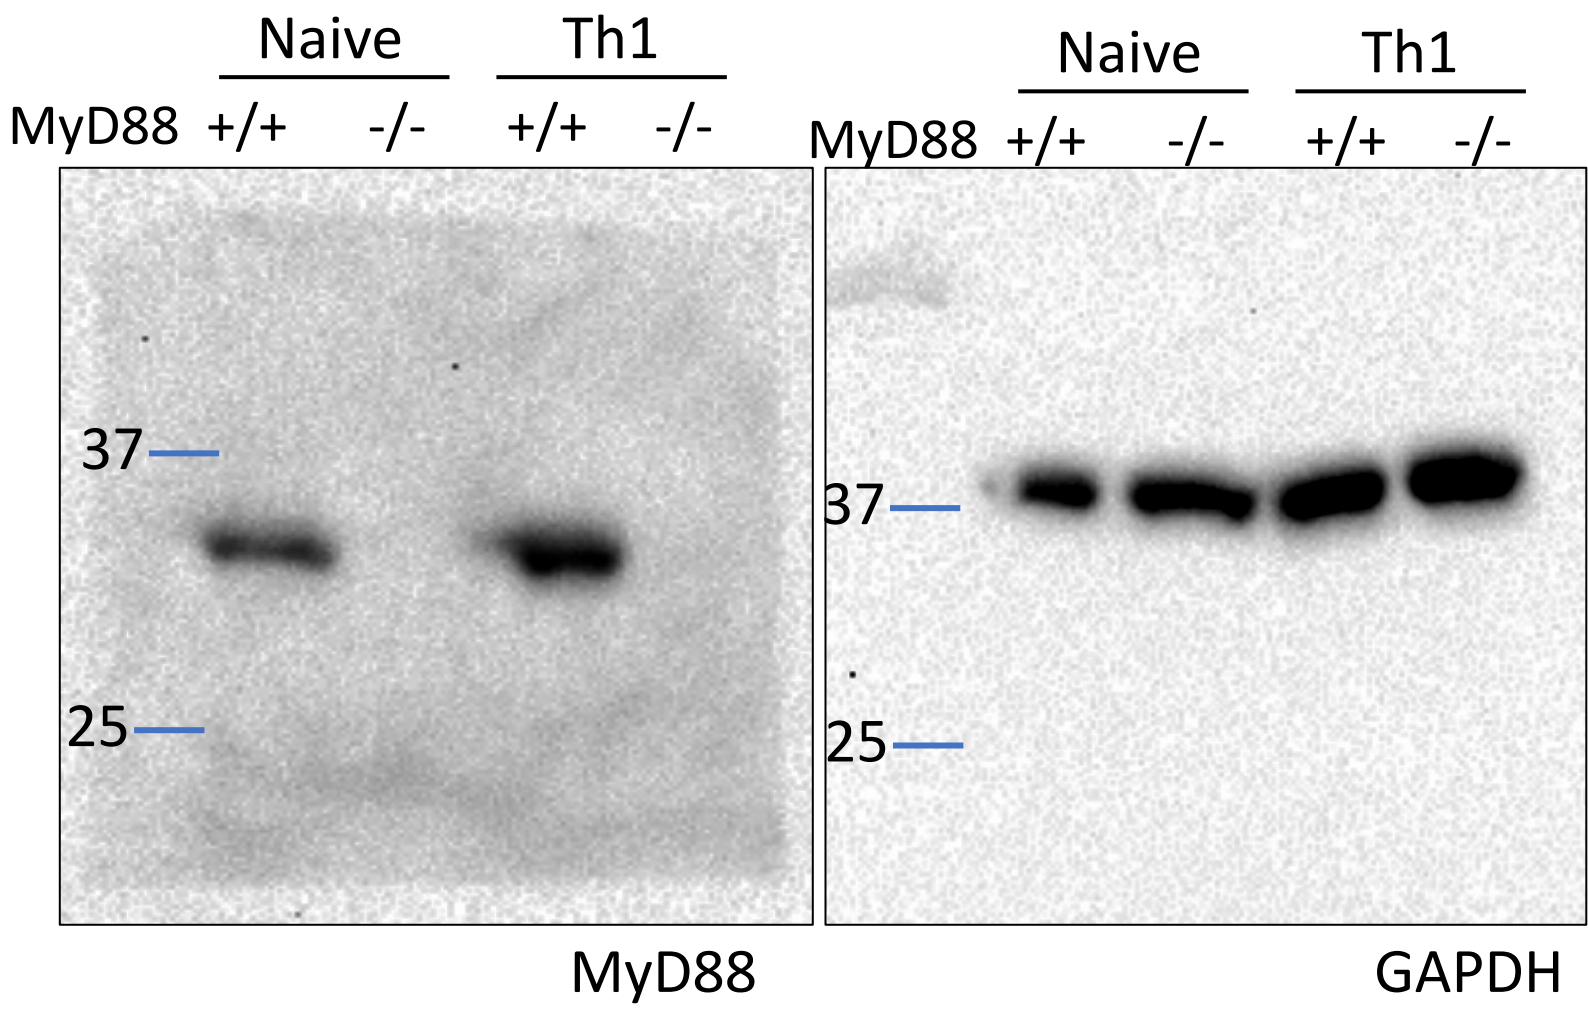

*Blots were cut above 50 kDa*

**Figure 7B:**

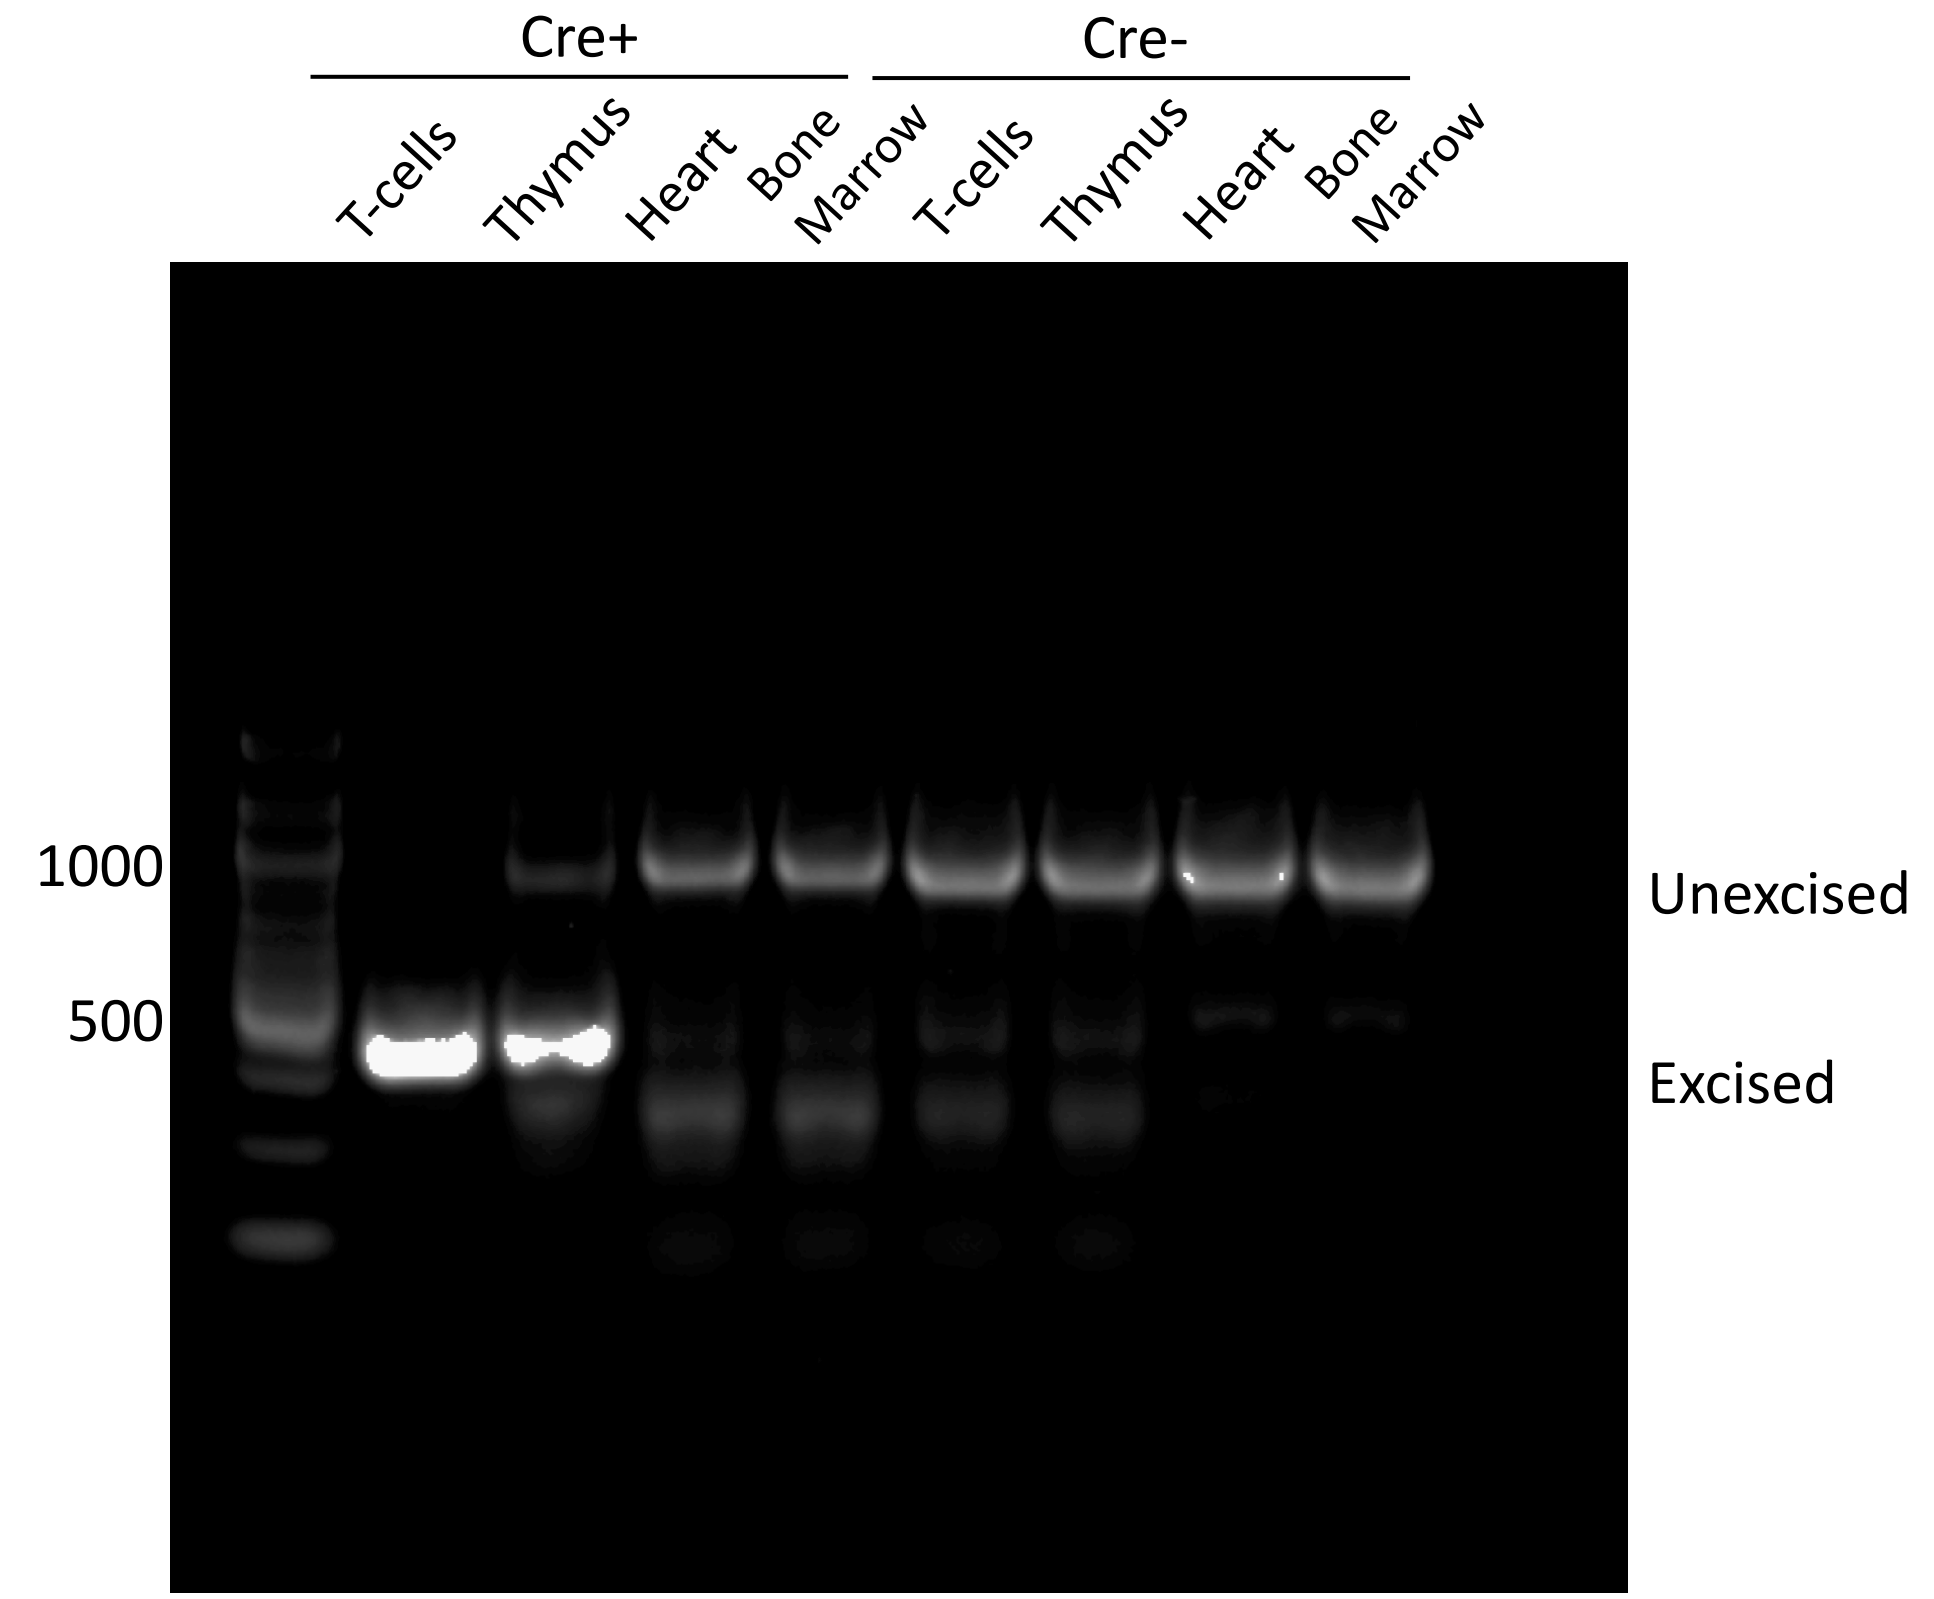



**Figure 7C:**

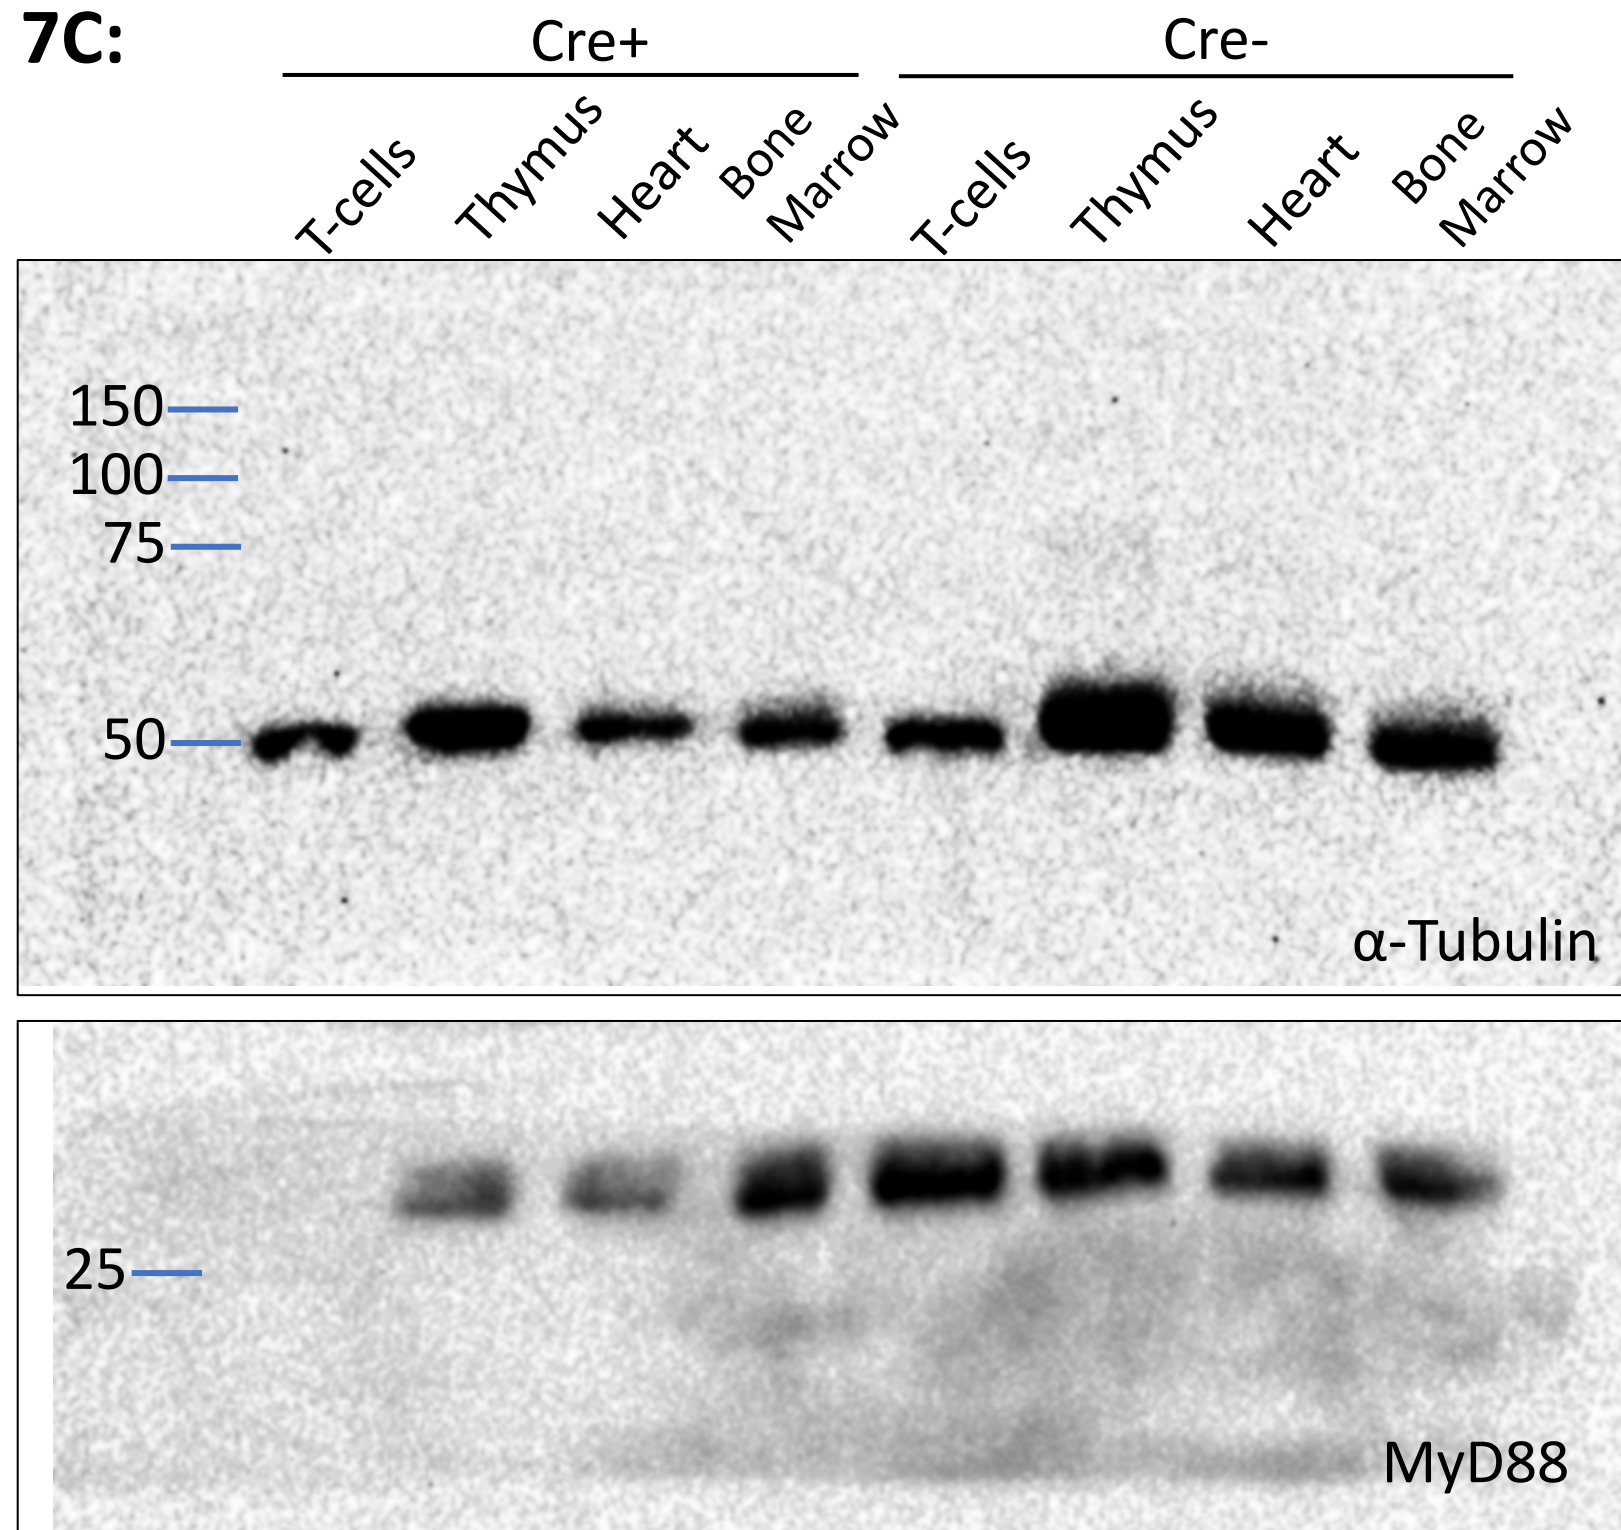

*Blot was cut around 37 kDa*

**Figure 8F:**

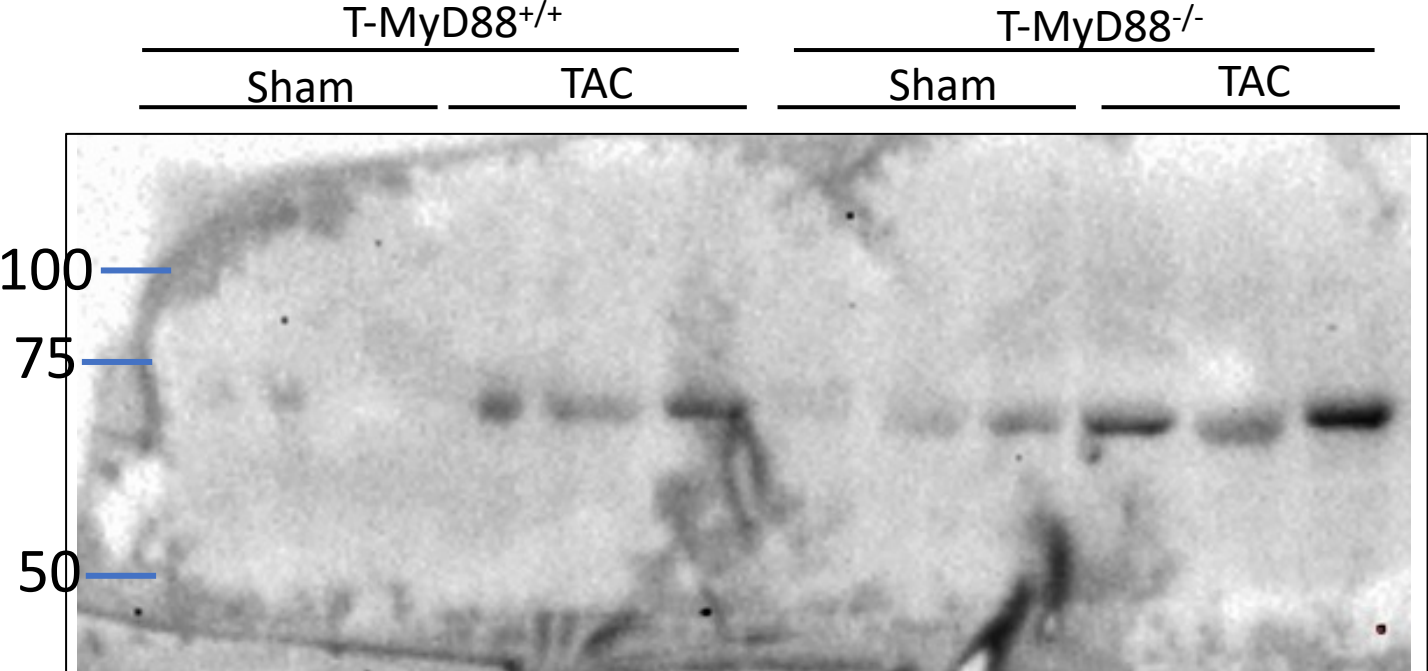

pZAP70

*Stripped and reexposed*

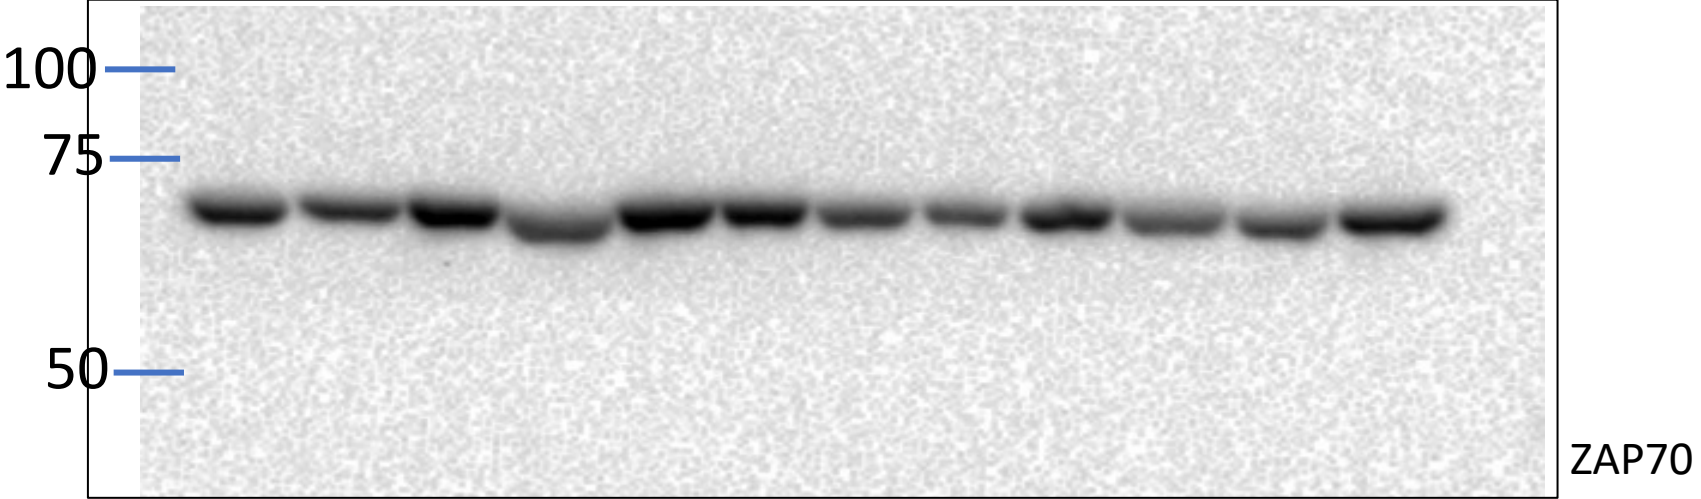

ZAP70

*Blot was cut around 50 kDa*

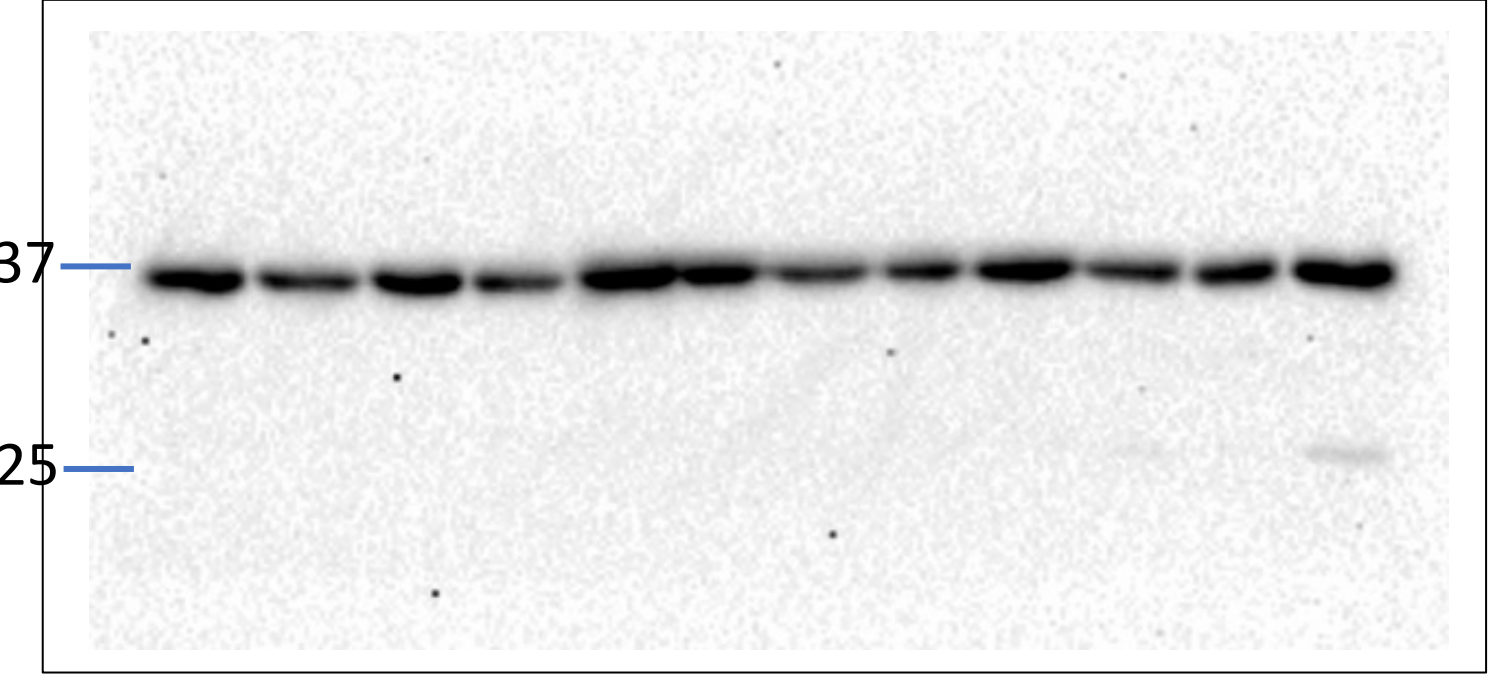

GAPDH

**Figure S4D:**

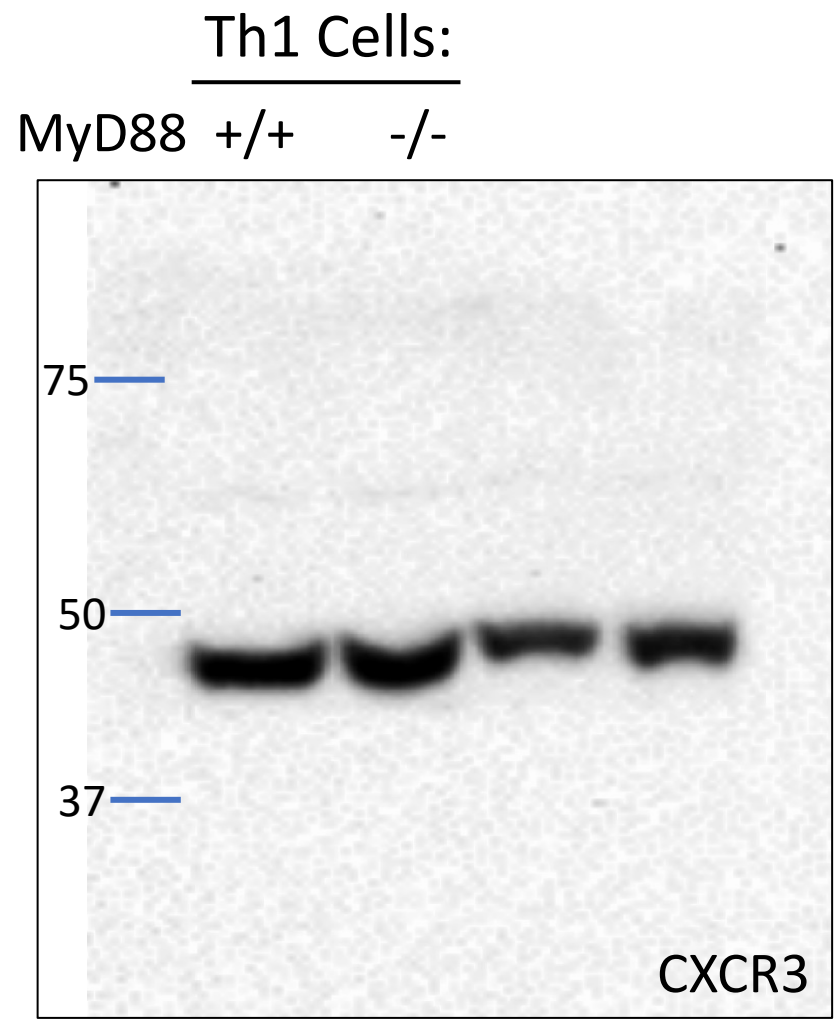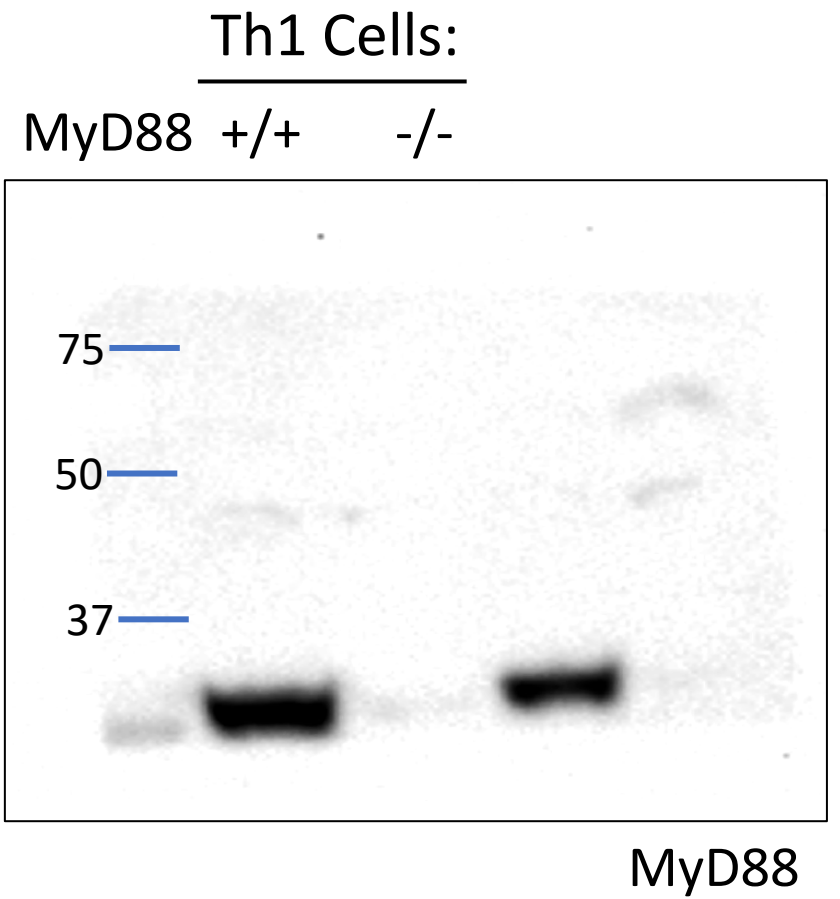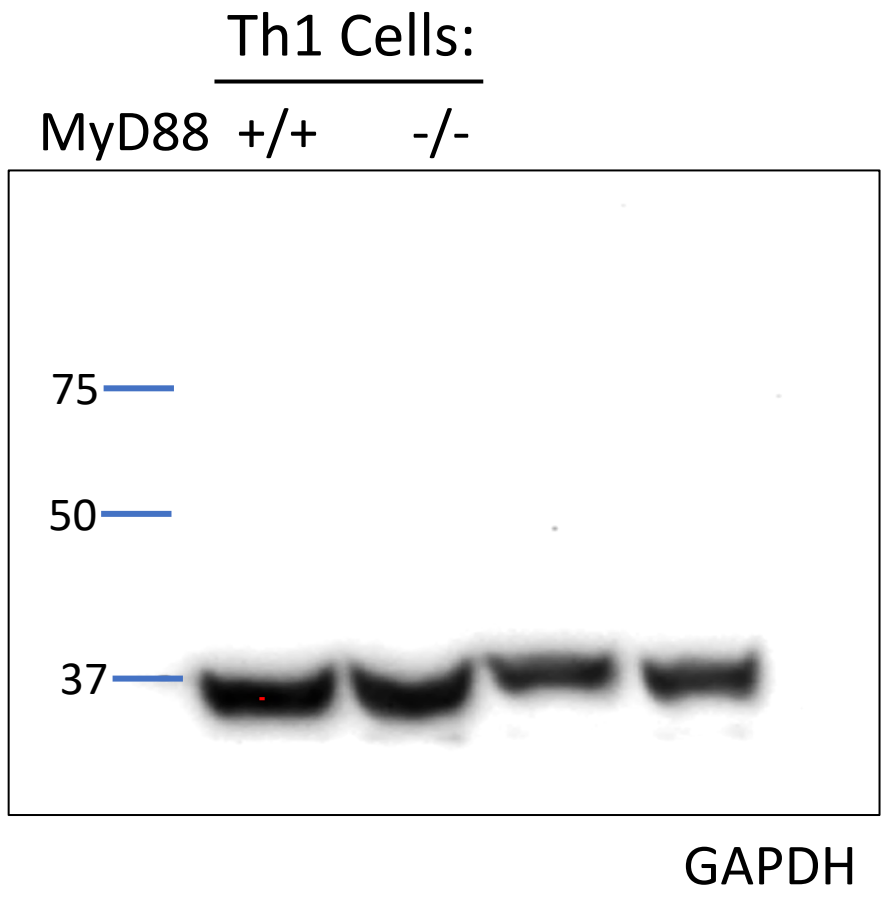

Top of blots were trimmed off

\*lanes 3 and 4 are different samples from another experiment run on the same gel

**Figure S6A:**

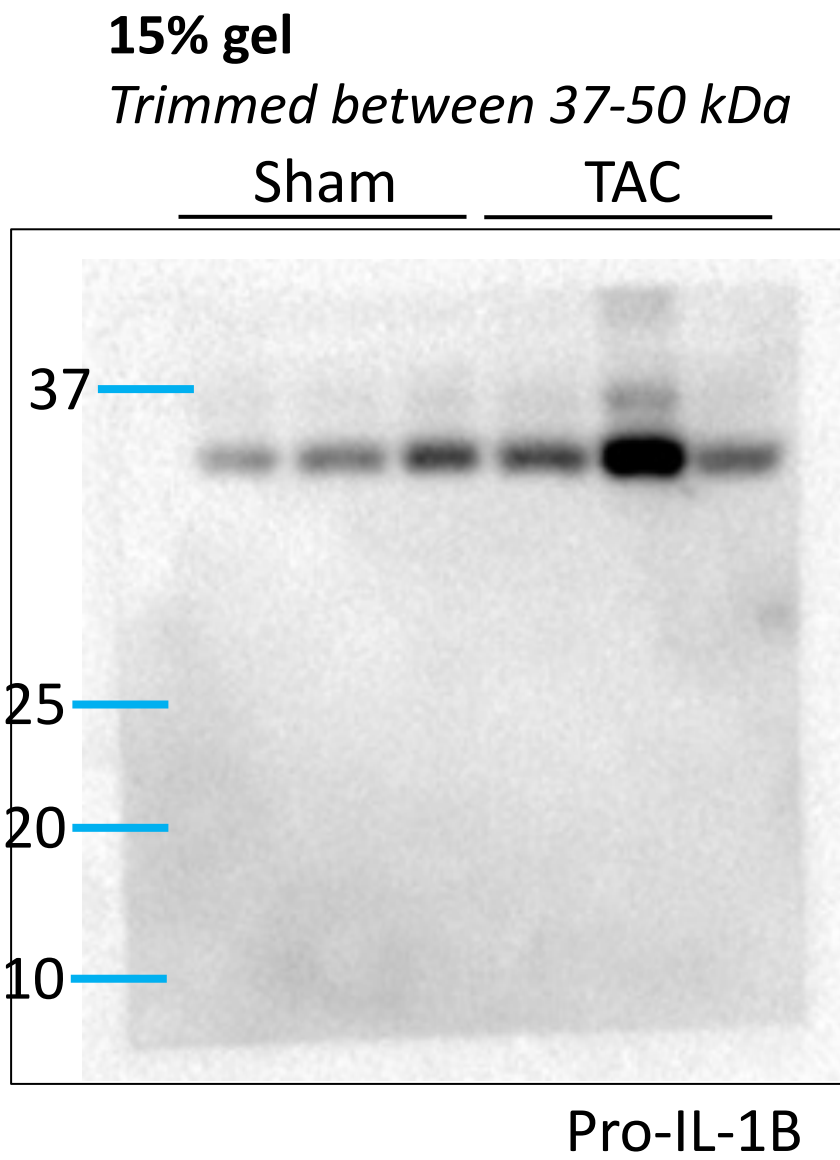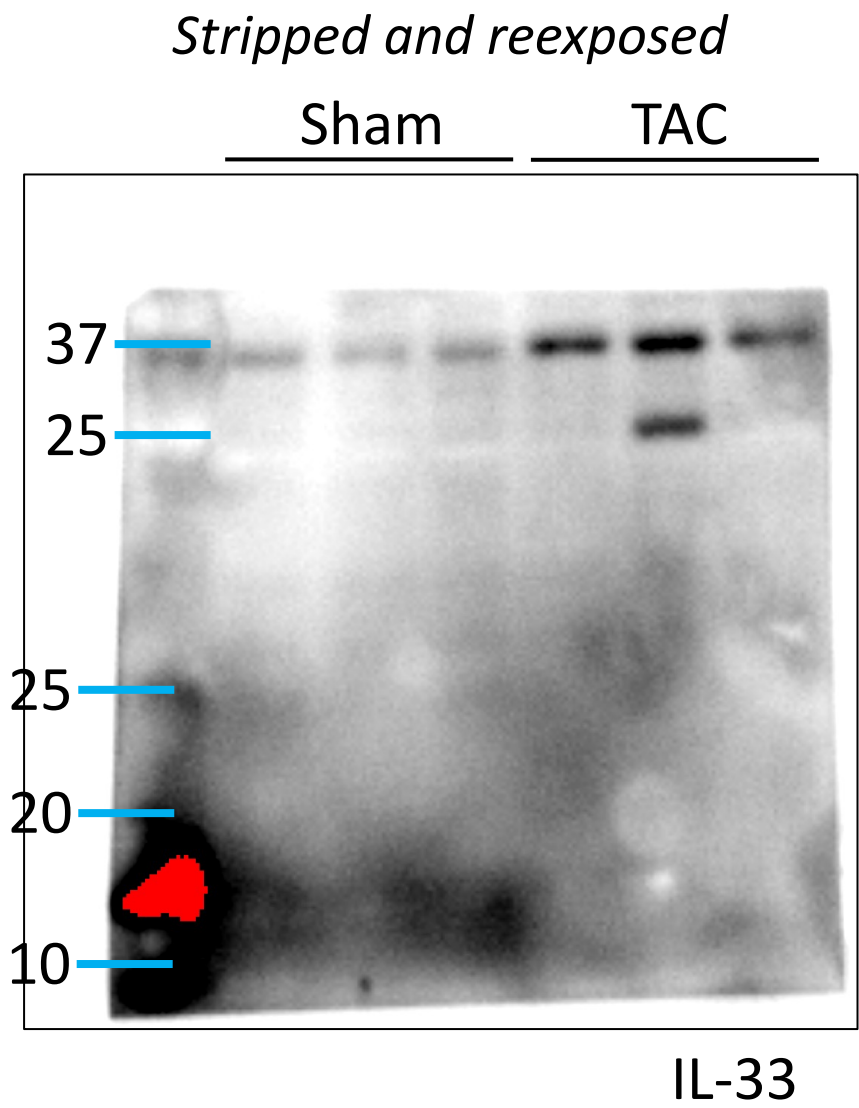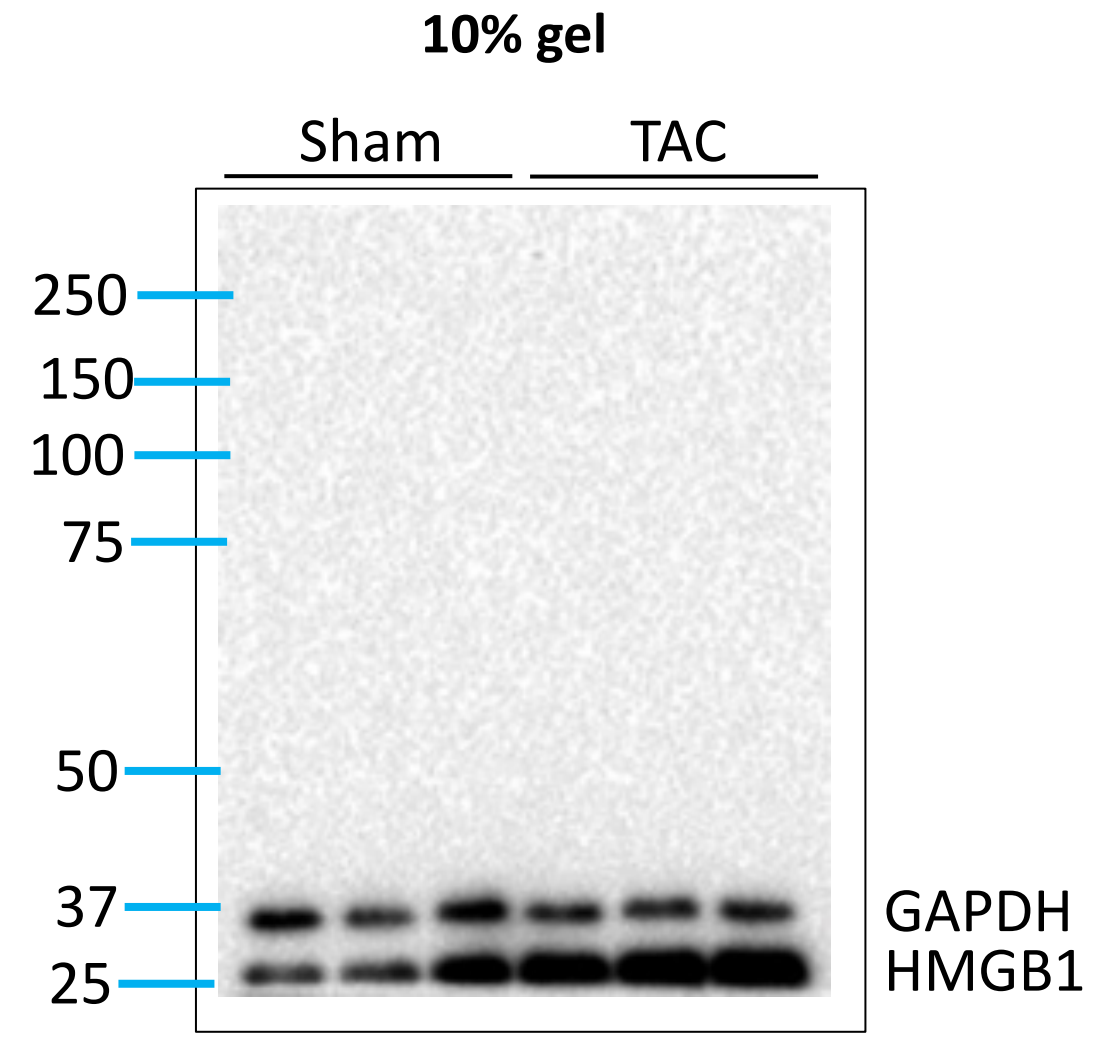



**Figure S6H:**

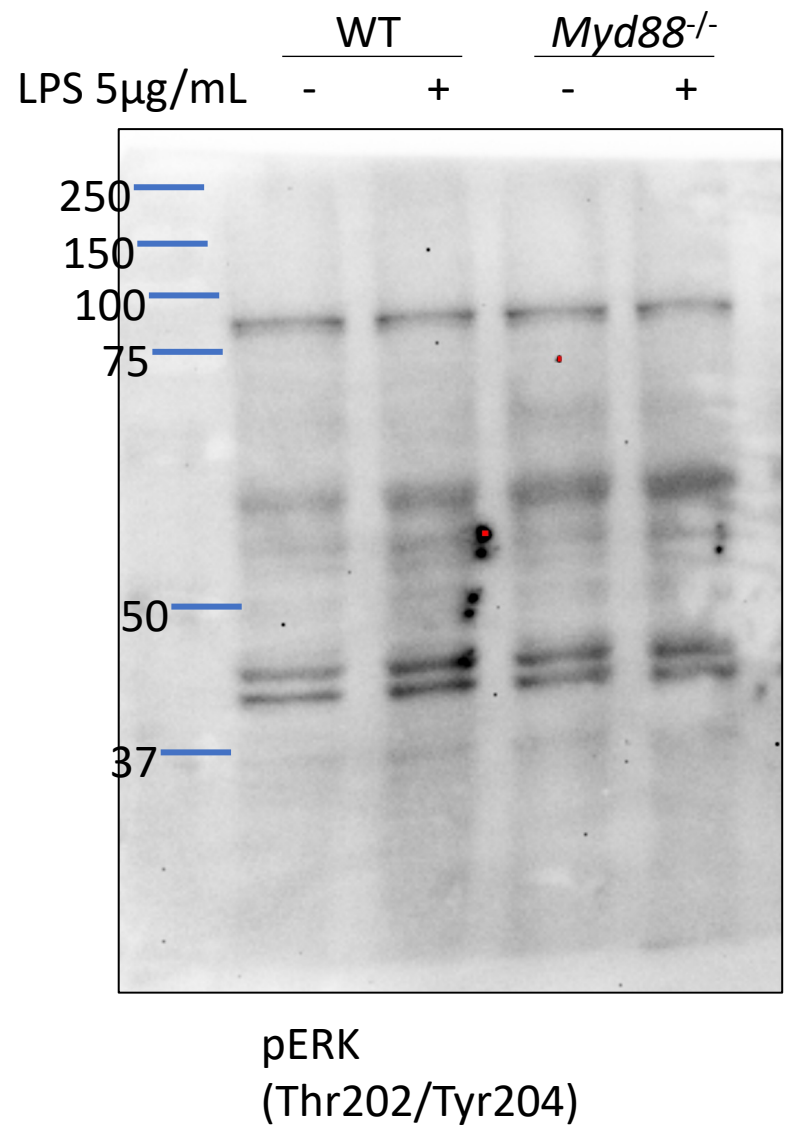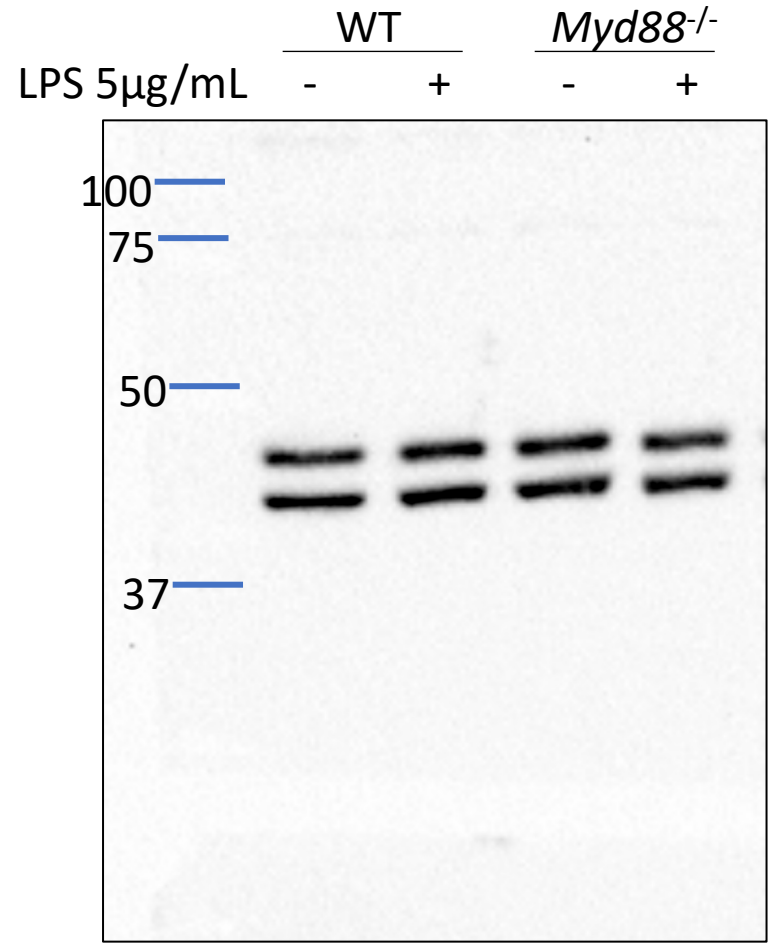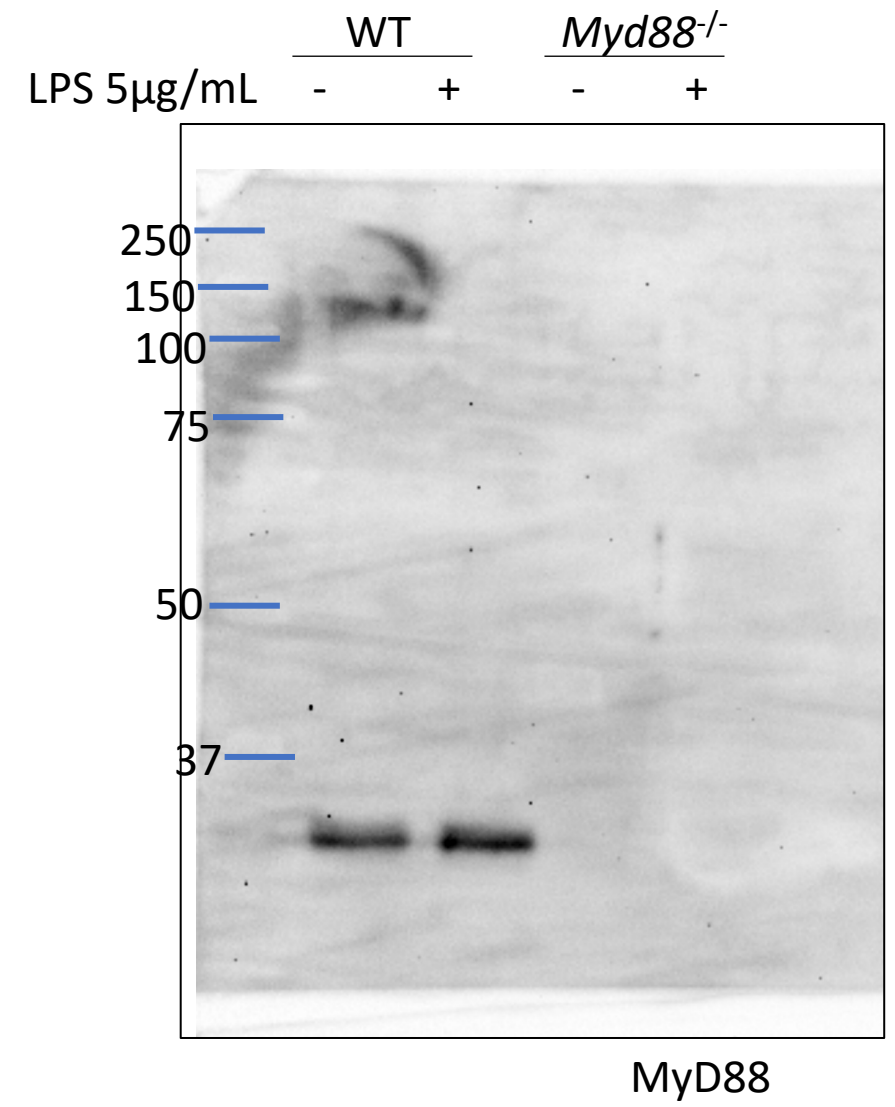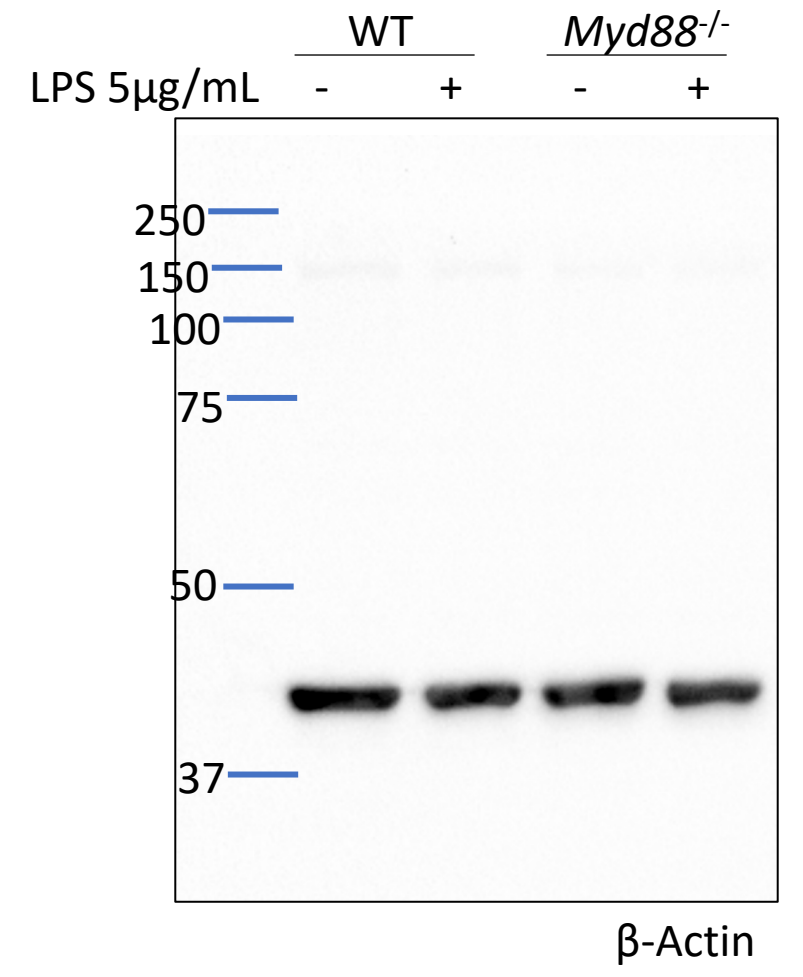

**Figure S7C:**

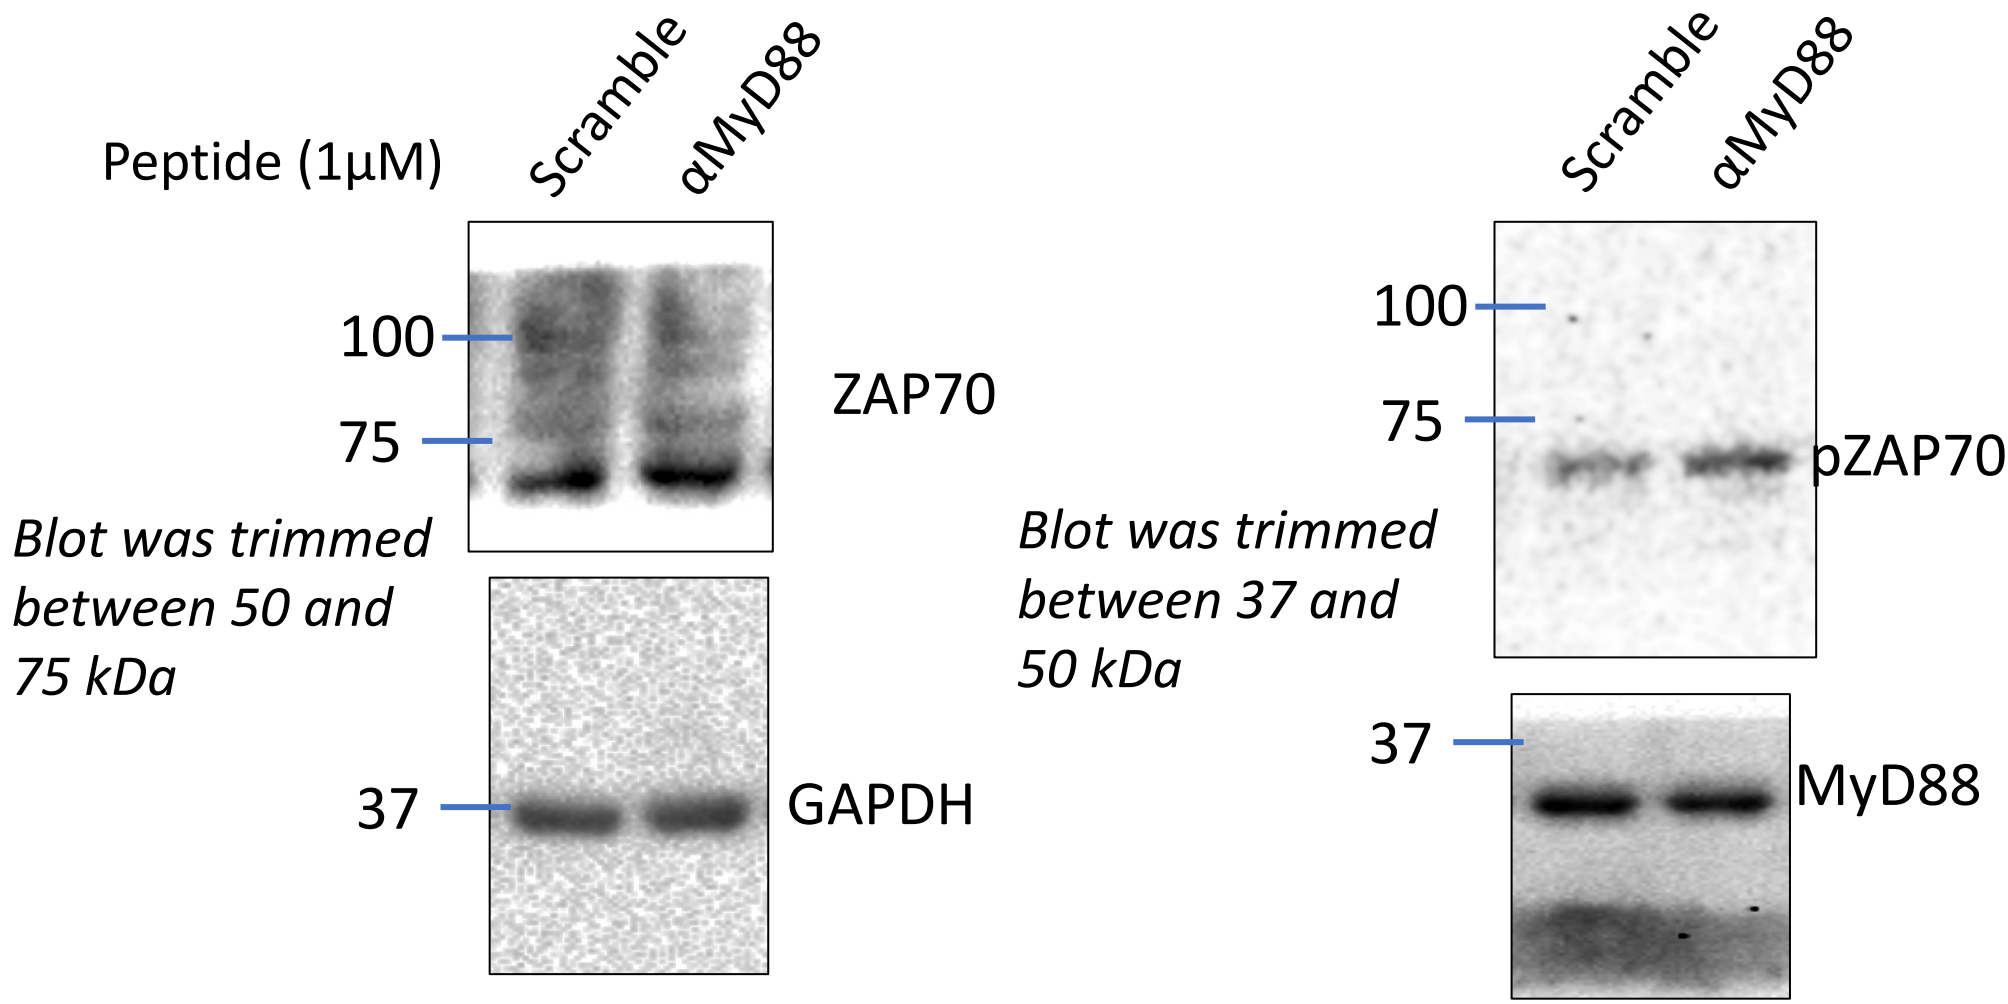

Supplement: NIHMS1918877-supplement-323030_Uncut_Gel_Blots.pdf [file NIHMS1918877-supplement-323030_Uncut_Gel_Blots.pdf]
