# Supplementary material
Source: PubMed Central journal article supplement (PMC10529989)
Supplement: NIHMS1918877-supplement-323030_Major_Resource_Table.pdf [file NIHMS1918877-supplement-323030_Major_Resource_Table.pdf]

## Major Resources Table

In order to allow validation and replication of experiments, all essential research materials listed in the Methods should be included in the Major Resources Table below. Authors are encouraged to use public repositories for protocols, data, code, and other materials and provide persistent identifiers and/or links to repositories when available. Authors may add or delete rows as needed.

### Animals (in vivo studies)

| Species | Vendor or Source | Background Strain | Sex | Persistent ID / URL |
|---------|------------------|-------------------|-----|---------------------|
| Mice    | Jackson Labs     | C57BL6/J          | M/F | IMSR_JAX:000664     |
|         |                  |                   |     |                     |
|         |                  |                   |     |                     |

### Genetically Modified Animals

|                      | Species | Vendor or Source | Background Strain | Other Information  | Persistent ID / URL |
|----------------------|---------|------------------|-------------------|--------------------|---------------------|
| Parent - Male        | Mice    | Jackson Labs     | C57BL6/J          | CD4-Cre            | IMSR_JAX:022071     |
| Parent - Female      | Mice    | Jackson Labs     | C57BL6/J          | MyD88 Flox         | IMSR_JAX:008888     |
| Parent – Male/Female | Mice    | Jackson Labs     | C57BL6/J          | MyD88 Knockout     | IMSR_JAX:009088     |
| Parent – Male/Female | Mice    | Jackson Labs     | C57BL6/J          | TCR alpha Knockout | IMSR_JAX:002116     |
| Parent – Male/Female | Mice    | Jackson Labs     | C57BL6/J          | CD45.1             | IMSR_JAX:002116     |

### Antibodies

| Target antigen | Vendor or Source | Catalog # | Working concentration   | Persistent ID / URL                                                                                                                                                                                                                                     |
|----------------|------------------|-----------|-------------------------|---------------------------------------------------------------------------------------------------------------------------------------------------------------------------------------------------------------------------------------------------------|
| CD3            | Biolegend        | 100253    | Cell culture: 2.5 µg/mL | <a href="https://www.biolegend.com/fr-lu/explore-new-products/ultra-leaf-purified-anti-mouse-cd3-antibody-8078?GroupID=BLG242">https://www.biolegend.com/fr-lu/explore-new-products/ultra-leaf-purified-anti-mouse-cd3-antibody-8078?GroupID=BLG242</a> |
| CD28           | Biolegend        | 102102    | Cell culture: 1.0 µg/mL | <a href="https://www.biolegend.com/en-us/products/purified-anti-mouse-cd28-antibody-117">https://www.biolegend.com/en-us/products/purified-anti-mouse-cd28-antibody-117</a>                                                                             |
| IL-4           | Biolegend        | 504102    | Cell culture: 50 ng/mL  | <a href="https://www.biolegend.com/en-us/products/purified-anti-mouse-il-4-antibody-894">https://www.biolegend.com/en-us/products/purified-anti-mouse-il-4-antibody-894</a>                                                                             |
| CD49d          | Biolegend        | 103701    | Cell culture: 20 µg/mL  | <a href="https://www.biolegend.com/en-us/products/purified-anti-mouse-cd49d-antibody-194">https://www.biolegend.com/en-us/products/purified-anti-mouse-cd49d-antibody-194</a>                                                                           |
| CD49d          | Biolegend        | 103629    | Cell culture: 20 µg/mL  | <a href="https://www.biolegend.com/en-us/products/ultra-leaf-purified-anti-mouse-cd49d-antibody-18975">https://www.biolegend.com/en-us/products/ultra-leaf-purified-anti-mouse-cd49d-antibody-18975</a>                                                 |
| CD11a          | Biolegend        | 101101    | Cell culture: 20 µg/mL  | <a href="https://www.biolegend.com/en-us/products/purified-anti-mouse-cd11a-antibody-356">https://www.biolegend.com/en-us/products/purified-anti-mouse-cd11a-antibody-356</a>                                                                           |
| TGFβ 1,2,3     | ThermoFisher     | MA5-23795 | Cell culture: 5 µg/mL   | <a href="https://www.thermofisher.com/antibody/product/TGF-beta-1-2-3-Antibody-clone-1D11-Monoclonal/MA5-23795">https://www.thermofisher.com/antibody/product/TGF-beta-1-2-3-Antibody-clone-1D11-Monoclonal/MA5-23795</a>                               |
| CD4            | Biolegend        | 100402    | IHC 1:200               | <a href="https://www.biolegend.com/en-us/products/purified-anti-mouse-cd4-antibody-252">https://www.biolegend.com/en-us/products/purified-anti-mouse-cd4-antibody-252</a>                                                                               |
| CD4 APC-Cy7    | Biolegend        | 100414    | FC 1:50                 | <a href="https://www.biolegend.com/en-us/products/apc-cyanine7-anti-mouse-cd4-antibody-1964">https://www.biolegend.com/en-us/products/apc-cyanine7-anti-mouse-cd4-antibody-1964</a>                                                                     |
| CD4 FITC       | Biolegend        | 100406    | FC: 1:50                | <a href="https://www.biolegend.com/en-us/products/fitc-anti-mouse-cd4-antibody-248">https://www.biolegend.com/en-us/products/fitc-anti-mouse-cd4-antibody-248</a>                                                                                       |
| CD4 AF594      | Biolegend        | 100446    | IF 1:100                | <a href="https://www.biolegend.com/en-us/products/alexa-fluor-594-anti-mouse-cd4-antibody-9412">https://www.biolegend.com/en-us/products/alexa-fluor-594-anti-mouse-cd4-antibody-9412</a>                                                               |
| CD8 FITC       | Biolegend        | 100705    | FC: 1:50                | <a href="https://www.biolegend.com/en-us/products/fitc-anti-mouse-cd8a-antibody-153">https://www.biolegend.com/en-us/products/fitc-anti-mouse-cd8a-antibody-153</a>                                                                                     |
| IFNγ APC       | Biolegend        | 505810    | FC: 1:50                | <a href="https://www.biolegend.com/en-us/products/apc-anti-mouse-ifn-gamma-antibody-993">https://www.biolegend.com/en-us/products/apc-anti-mouse-ifn-gamma-antibody-993</a>                                                                             |

DOI [to be added]

|                     |            |             |           |                                                                                                                                                                                                                                                                           |
|---------------------|------------|-------------|-----------|---------------------------------------------------------------------------------------------------------------------------------------------------------------------------------------------------------------------------------------------------------------------------|
| IL-17 PE            | Biolegend  | 506904      | FC: 1:50  | <a href="https://www.biolegend.com/en-us/products/pe-anti-mouse-il-17a-antibody-1633">https://www.biolegend.com/en-us/products/pe-anti-mouse-il-17a-antibody-1633</a>                                                                                                     |
| Tbx1 PerCP          | Biolegend  | 644806      | FC: 1:50  | <a href="https://www.biolegend.com/en-us/products/percp-cyanine5-5-anti-t-bet-antibody-5760">https://www.biolegend.com/en-us/products/percp-cyanine5-5-anti-t-bet-antibody-5760</a>                                                                                       |
| TCR $\beta$ APC-Cy7 | Biolegend  | 109220      | FC: 1:50  | <a href="https://www.biolegend.com/en-us/products/apc-cyanine7-anti-mouse-tcr-beta-chain-antibody-4137">https://www.biolegend.com/en-us/products/apc-cyanine7-anti-mouse-tcr-beta-chain-antibody-4137</a>                                                                 |
| CD45.2 BV421        | Biolegend  | 109832      | FC: 1:50  | <a href="https://www.biolegend.com/en-us/products/brilliant-violet-421-anti-mouse-cd45-2-antibody-7328">https://www.biolegend.com/en-us/products/brilliant-violet-421-anti-mouse-cd45-2-antibody-7328</a>                                                                 |
| CD45.2 APC          | Biolegend  | 109813      | FC: 1:50  | <a href="https://www.biolegend.com/en-us/search-results/apc-anti-mouse-cd45-2-antibody-2759">https://www.biolegend.com/en-us/search-results/apc-anti-mouse-cd45-2-antibody-2759</a>                                                                                       |
| CD45.1 APC          | Biolegend  | 109814      | FC: 1:50  | <a href="https://www.biolegend.com/en-us/products/apc-anti-mouse-cd45-2-antibody-2759">https://www.biolegend.com/en-us/products/apc-anti-mouse-cd45-2-antibody-2759</a>                                                                                                   |
| CD45.1 PE           | Biolegend  | 110707      | FC: 1:50  | <a href="https://www.biolegend.com/en-us/products/pe-anti-mouse-cd45-1-antibody-199">https://www.biolegend.com/en-us/products/pe-anti-mouse-cd45-1-antibody-199</a>                                                                                                       |
| CD11a APC           | Biolegend  | 101119      | FC: 1:50  | <a href="https://www.biolegend.com/en-us/products/apc-anti-mouse-cd11a-antibody-9069">https://www.biolegend.com/en-us/products/apc-anti-mouse-cd11a-antibody-9069</a>                                                                                                     |
| CD49d FITC          | Biolegend  | 103606      | FC: 1:50  | <a href="https://www.biolegend.com/en-us/products/fitc-anti-mouse-cd49d-antibody-438">https://www.biolegend.com/en-us/products/fitc-anti-mouse-cd49d-antibody-438</a>                                                                                                     |
| TLR4 PE             | Biolegend  | 145404      | FC: 1:50  | <a href="https://www.biolegend.com/en-us/products/pe-anti-mouse-cd284-tlr4-antibody-8397">https://www.biolegend.com/en-us/products/pe-anti-mouse-cd284-tlr4-antibody-8397</a>                                                                                             |
| IL-1r APC           | Biolegend  | 113509      | FC: 1:50  | <a href="https://www.biolegend.com/en-us/products/apc-anti-mouse-cd121a-il-1-r-type-i-p80-antibody-6371">https://www.biolegend.com/en-us/products/apc-anti-mouse-cd121a-il-1-r-type-i-p80-antibody-6371</a>                                                               |
| IL-33r PE-Cy7       | Biolegend  | 145316      | FC: 1:50  | <a href="https://www.biolegend.com/en-us/products/pe-cyanine7-anti-mouse-il-33alpha-il1r1l1-st2-antibody-14675">https://www.biolegend.com/en-us/products/pe-cyanine7-anti-mouse-il-33alpha-il1r1l1-st2-antibody-14675</a>                                                 |
| CD44 APC            | Biolegend  | 103012      | FC: 1:50  | <a href="https://www.biolegend.com/en-us/products/apc-anti-mouse-human-cd44-antibody-312">https://www.biolegend.com/en-us/products/apc-anti-mouse-human-cd44-antibody-312</a>                                                                                             |
| CD62L PE            | Biolegend  | 104408      | FC: 1:50  | <a href="https://www.biolegend.com/en-us/products/pe-anti-mouse-cd62l-antibody-386">https://www.biolegend.com/en-us/products/pe-anti-mouse-cd62l-antibody-386</a>                                                                                                         |
| CD25 BV421          | Biolegend  | 102043      | FC: 1:50  | <a href="https://www.biolegend.com/en-us/products/brilliant-violet-421-anti-mouse-cd25-antibody-7197">https://www.biolegend.com/en-us/products/brilliant-violet-421-anti-mouse-cd25-antibody-7197</a>                                                                     |
| CD69 FITC           | Biolegend  | 104506      | FC: 1:50  | <a href="https://www.biolegend.com/en-us/products/fitc-anti-mouse-cd69-antibody-264">https://www.biolegend.com/en-us/products/fitc-anti-mouse-cd69-antibody-264</a>                                                                                                       |
| CXCR3 APC           | Biolegend  | 126512      | FC: 1:50  | <a href="https://www.biolegend.com/en-us/products/apc-anti-mouse-cd183-cxcr3-antibody-4683">https://www.biolegend.com/en-us/products/apc-anti-mouse-cd183-cxcr3-antibody-4683</a>                                                                                         |
| MHCII APC           | Biolegend  | 107613      | FC: 1:50  | <a href="https://www.biolegend.com/en-us/products/apc-anti-mouse-i-a-i-e-antibody-2488">https://www.biolegend.com/en-us/products/apc-anti-mouse-i-a-i-e-antibody-2488</a>                                                                                                 |
| CD11b APC-Cy7       | Biolegend  | 101225      | FC: 1:50  | <a href="https://www.biolegend.com/en-us/products/apc-cyanine7-anti-mouse-human-cd11b-antibody-3930">https://www.biolegend.com/en-us/products/apc-cyanine7-anti-mouse-human-cd11b-antibody-3930</a>                                                                       |
| CD11c PE            | Biolegend  | 117307      | FC: 1:50  | <a href="https://www.biolegend.com/en-us/products/pe-anti-mouse-cd11c-antibody-1816">https://www.biolegend.com/en-us/products/pe-anti-mouse-cd11c-antibody-1816</a>                                                                                                       |
| Ly6G BV421          | Biolegend  | 127627      | FC: 1:50  | <a href="https://www.biolegend.com/en-us/products/brilliant-violet-421-anti-mouse-ly-6g-antibody-7161">https://www.biolegend.com/en-us/products/brilliant-violet-421-anti-mouse-ly-6g-antibody-7161</a>                                                                   |
| CCR2 FITC           | Biolegend  | 150607      | FC: 1:50  | <a href="https://www.biolegend.com/en-us/products/fitc-anti-mouse-cd192-ccr2-antibody-13354">https://www.biolegend.com/en-us/products/fitc-anti-mouse-cd192-ccr2-antibody-13354</a>                                                                                       |
| Mefsk4 APC          | Miltenyi   | 130-120-166 | FC: 1:50  | <a href="https://www.miltenyibiotec.com/US-en/products/feeder-cells-antibody-anti-mouse-mef-sk4.html#conjugate=pe:size=30-ug-in-200-ul">https://www.miltenyibiotec.com/US-en/products/feeder-cells-antibody-anti-mouse-mef-sk4.html#conjugate=pe:size=30-ug-in-200-ul</a> |
| Foxp3 PE            | Invitrogen | 14-5773-82  | FC 1:500  | <a href="https://www.thermofisher.com/antibody/product/FOXP3-Antibody-clone-FJK-16s-Monoclonal/14-5773-82">https://www.thermofisher.com/antibody/product/FOXP3-Antibody-clone-FJK-16s-Monoclonal/14-5773-82</a>                                                           |
| IL-1 $\beta$        | CST        | 12242       | WB 1:1000 | <a href="https://www.cellsignal.com/products/primary-antibodies/il-1b-3a6-mouse-mab/12242">https://www.cellsignal.com/products/primary-antibodies/il-1b-3a6-mouse-mab/12242</a>                                                                                           |
| IL-33               | R&D        | AF3626      | WB 1:500  | <a href="https://www.rndsystems.com/products/mouse-il-33-antibody_af3626">https://www.rndsystems.com/products/mouse-il-33-antibody_af3626</a>                                                                                                                             |
| HMGB1               | Abcam      | 79823       | WB 1:1000 | <a href="https://www.abcam.com/hmgb1-antibody-epr3507-ab79823.html">https://www.abcam.com/hmgb1-antibody-epr3507-ab79823.html</a>                                                                                                                                         |

|                       |              |               |                       |                                                                                                                                                                                                                                                                                     |
|-----------------------|--------------|---------------|-----------------------|-------------------------------------------------------------------------------------------------------------------------------------------------------------------------------------------------------------------------------------------------------------------------------------|
| TRIF                  | NovusBio     | NB120-13810SS | WB 1:500              | <a href="https://www.novusbio.com/products/trif-ticam1-antibody_nb120-13810">https://www.novusbio.com/products/trif-ticam1-antibody_nb120-13810</a>                                                                                                                                 |
| GAPDH                 | CST          | 2118          | WB 1:2000             | <a href="https://www.cellsignal.com/products/primary-antibodies/gapdh-14c10-rabbit-mab/2118">https://www.cellsignal.com/products/primary-antibodies/gapdh-14c10-rabbit-mab/2118</a>                                                                                                 |
| MyD88                 | R&D          | AF3109        | WB 1:1000<br>IF 1:100 | <a href="https://www.rndsystems.com/products/mouse-rat-myd88-antibody_af3109">https://www.rndsystems.com/products/mouse-rat-myd88-antibody_af3109</a>                                                                                                                               |
| pERK                  | CST          | 9101          | WB 1:1000             | <a href="https://www.cellsignal.com/products/primary-antibodies/phospho-p44-42-mapk-erk1-2-thr202-tyr204-antibody/9101">https://www.cellsignal.com/products/primary-antibodies/phospho-p44-42-mapk-erk1-2-thr202-tyr204-antibody/9101</a>                                           |
| ERK                   | CST          | 9102          | WB 1:1000             | <a href="https://www.cellsignal.com/products/primary-antibodies/p44-42-mapk-erk1-2-antibody/9102">https://www.cellsignal.com/products/primary-antibodies/p44-42-mapk-erk1-2-antibody/9102</a>                                                                                       |
| β-actin               | Sigma        | A5441         | WB 1:2000             | <a href="https://www.sigmaaldrich.com/US/en/product/sigma/a5441">https://www.sigmaaldrich.com/US/en/product/sigma/a5441</a>                                                                                                                                                         |
| α-tubulin             | CST          | 3873          | WB 1:1000             | <a href="https://www.cellsignal.com/products/primary-antibodies/a-tubulin-dm1a-mouse-mab/3873">https://www.cellsignal.com/products/primary-antibodies/a-tubulin-dm1a-mouse-mab/3873</a>                                                                                             |
| α-smooth muscle actin | Sigma        | A2547         | WB 1:1000<br>IF 1:100 | <a href="https://www.sigmaaldrich.com/US/en/product/sigma/a2547">https://www.sigmaaldrich.com/US/en/product/sigma/a2547</a>                                                                                                                                                         |
| pP38                  | CST          | 4511          | WB 1:1000             | <a href="https://www.cellsignal.com/products/primary-antibodies/phospho-p38-mapk-thr180-tyr182-d3f9-xp-rabbit-mab/4511">https://www.cellsignal.com/products/primary-antibodies/phospho-p38-mapk-thr180-tyr182-d3f9-xp-rabbit-mab/4511</a>                                           |
| P38                   | CST          | 9212          | WB 1:1000             | <a href="https://www.cellsignal.com/products/primary-antibodies/p38-mapk-antibody/9212">https://www.cellsignal.com/products/primary-antibodies/p38-mapk-antibody/9212</a>                                                                                                           |
| pP65                  | CST          | 3033          | WB 1:1000             | <a href="https://www.cellsignal.com/products/primary-antibodies/phospho-nf-kb-p65-ser536-93h1-rabbit-mab/3033">https://www.cellsignal.com/products/primary-antibodies/phospho-nf-kb-p65-ser536-93h1-rabbit-mab/3033</a>                                                             |
| P65                   | CST          | 4764          | WB 1:1000             | <a href="https://www.cellsignal.com/products/primary-antibodies/nf-kb-p65-c22b4-rabbit-mab/4764">https://www.cellsignal.com/products/primary-antibodies/nf-kb-p65-c22b4-rabbit-mab/4764</a>                                                                                         |
| pAKT                  | CST          | 4060          | WB 1:1000             | <a href="https://www.cellsignal.com/products/primary-antibodies/phospho-akt-ser473-d9e-xp-rabbit-mab/4060">https://www.cellsignal.com/products/primary-antibodies/phospho-akt-ser473-d9e-xp-rabbit-mab/4060</a>                                                                     |
| AKT                   | CST          | 4691          | WB 1:1000             | <a href="https://www.cellsignal.com/products/primary-antibodies/akt-pan-c67e7-rabbit-mab/4691">https://www.cellsignal.com/products/primary-antibodies/akt-pan-c67e7-rabbit-mab/4691</a>                                                                                             |
| pZap70                | CST          | 2717          | WB 1:1000<br>IF 1:200 | <a href="https://www.cellsignal.com/products/primary-antibodies/phospho-zap-70-tyr319-syk-tyr352-65e4-rabbit-mab/2717">https://www.cellsignal.com/products/primary-antibodies/phospho-zap-70-tyr319-syk-tyr352-65e4-rabbit-mab/2717</a>                                             |
| Zap70                 | CST          | 3165          | WB 1:1000             | <a href="https://www.cellsignal.com/products/primary-antibodies/zap-70-d1c10e-xp-rabbit-mab/3165">https://www.cellsignal.com/products/primary-antibodies/zap-70-d1c10e-xp-rabbit-mab/3165</a>                                                                                       |
| Collagen 1            | Invitrogen   | PIPA529569    | WB 1:1000             | <a href="https://www.fishersci.com/shop/products/anti-col1a1-polyclonal/PIPA529569">https://www.fishersci.com/shop/products/anti-col1a1-polyclonal/PIPA529569</a>                                                                                                                   |
| CXCR3                 | Bios         | 2209R         | WB 1:1000             | <a href="https://www.biossusa.com/products/bs-2209r">https://www.biossusa.com/products/bs-2209r</a>                                                                                                                                                                                 |
| Rabbit IgG            | CST          | 7074          | WB 1:2000             | <a href="https://www.cellsignal.com/products/secondary-antibodies/anti-rabbit-igg-hrp-linked-antibody/7074">https://www.cellsignal.com/products/secondary-antibodies/anti-rabbit-igg-hrp-linked-antibody/7074</a>                                                                   |
| Mouse IgG             | CST          | 7076          | WB 1:2000             | <a href="https://www.cellsignal.com/products/secondary-antibodies/anti-mouse-igg-hrp-linked-antibody/7076">https://www.cellsignal.com/products/secondary-antibodies/anti-mouse-igg-hrp-linked-antibody/7076</a>                                                                     |
| Goat IgG              | ThermoFisher | A15999        | WB 1:2000             | <a href="https://www.thermofisher.com/antibody/product/Donkey-anti-Goat-IgG-H-L-Secondary-Antibody-Polyclonal/A15999">https://www.thermofisher.com/antibody/product/Donkey-anti-Goat-IgG-H-L-Secondary-Antibody-Polyclonal/A15999</a>                                               |
| Rat IgG Biotin        | Jackson      | 112-065-062   | IHC 1:300             | <a href="https://www.jacksonimmuno.com/catalog/products/112-065-062">https://www.jacksonimmuno.com/catalog/products/112-065-062</a>                                                                                                                                                 |
| CD31                  | Biolegend    | 102520        | IF 1:100              | <a href="https://www.biolegend.com/en-us/products/alexa-fluor-594-anti-mouse-cd31-antibody-9633?GroupID=BLG10559">https://www.biolegend.com/en-us/products/alexa-fluor-594-anti-mouse-cd31-antibody-9633?GroupID=BLG10559</a>                                                       |
| PDGFα                 | R&D          | AF1062        | IF 1:100              | <a href="https://www.rndsystems.com/products/mouse-pdgf-ralpha-antibody_af1062">https://www.rndsystems.com/products/mouse-pdgf-ralpha-antibody_af1062</a>                                                                                                                           |
| Ki67                  | Abcam        | Ab15580       | IF 1:100              | <a href="https://www.abcam.com/products/primary-antibodies/ki67-antibody-ab15580.html">https://www.abcam.com/products/primary-antibodies/ki67-antibody-ab15580.html</a>                                                                                                             |
| aMouse AF488          | Thermo       | A32766        | IF 1:200              | <a href="https://www.thermofisher.com/antibody/product/Donkey-anti-Mouse-IgG-H-L-Highly-Cross-Adsorbed-Secondary-Antibody-Polyclonal/A32766">https://www.thermofisher.com/antibody/product/Donkey-anti-Mouse-IgG-H-L-Highly-Cross-Adsorbed-Secondary-Antibody-Polyclonal/A32766</a> |
| aGoat AF488           | Thermo       | A11055        | IF 1:200              | <a href="https://www.thermofisher.com/antibody/product/Donkey-anti-Goat-IgG-H-L-Cross-Adsorbed-Secondary-Antibody-Polyclonal/A-11055">https://www.thermofisher.com/antibody/product/Donkey-anti-Goat-IgG-H-L-Cross-Adsorbed-Secondary-Antibody-Polyclonal/A-11055</a>               |

|                |        |        |          |                                                                                                                                                                                                                                                                                                       |
|----------------|--------|--------|----------|-------------------------------------------------------------------------------------------------------------------------------------------------------------------------------------------------------------------------------------------------------------------------------------------------------|
| aGoat AF555    | Thermo | A21432 | IF 1:200 | <a href="https://www.thermofisher.com/antibody/product/Donkey-anti-Goat-IgG-H-L-Cross-Adsorbed-Secondary-Antibody-Polyclonal/A-21432">https://www.thermofisher.com/antibody/product/Donkey-anti-Goat-IgG-H-L-Cross-Adsorbed-Secondary-Antibody-Polyclonal/A-21432</a>                                 |
| aHamster AF594 | Thermo | A78966 | IF 1:200 | <a href="https://www.thermofisher.com/antibody/product/Goat-anti-Armenian-Hamster-IgG-H-L-Highly-Cross-Adsorbed-Secondary-Antibody-Polyclonal/A78966">https://www.thermofisher.com/antibody/product/Goat-anti-Armenian-Hamster-IgG-H-L-Highly-Cross-Adsorbed-Secondary-Antibody-Polyclonal/A78966</a> |
| aRabbit AF555  | CST    | 4413   | IF 1:200 | <a href="https://www.cellsignal.com/products/secondary-antibodies/anti-rabbit-igg-h-l-f-ab-2-fragment-alexa-fluor-555-conjugate/4413">https://www.cellsignal.com/products/secondary-antibodies/anti-rabbit-igg-h-l-f-ab-2-fragment-alexa-fluor-555-conjugate/4413</a>                                 |

## Data & Code Availability

| Description                                       | Source / Repository | Persistent ID / URL                                                           |
|---------------------------------------------------|---------------------|-------------------------------------------------------------------------------|
| Reclustering and analysis of mouse scRNA seq data | Seurat              | <a href="https://satijalab.org/seurat/">https://satijalab.org/seurat/</a>     |
| Reclustering and analysis of human citeSeq data   | Nebula              | <a href="https://github.com/lhe17/nebula">https://github.com/lhe17/nebula</a> |

## Other

| Description                  | Source / Repository | Persistent ID / URL                                                                                                                                                                                         |
|------------------------------|---------------------|-------------------------------------------------------------------------------------------------------------------------------------------------------------------------------------------------------------|
| CD4 Magnetic Beads           | Miltenyi            | <a href="https://www.miltenyibiotec.com/US-en/products/cd4-l3t4-microbeads-mouse.html#gref">https://www.miltenyibiotec.com/US-en/products/cd4-l3t4-microbeads-mouse.html#gref</a>                           |
| IL-2                         | Miltenyi            | <a href="https://www.miltenyibiotec.com/US-en/products/mouse-il-2-is.html#gref">https://www.miltenyibiotec.com/US-en/products/mouse-il-2-is.html#gref</a>                                                   |
| IL-12                        | Peprtech            | <a href="https://www.peprtech.com/en/recombinant-murine-il-12">https://www.peprtech.com/en/recombinant-murine-il-12</a>                                                                                     |
| Direct Red 80                | Millipore Sigma     | <a href="https://www.sigmaaldrich.com/US/en/product/sial/365548">https://www.sigmaaldrich.com/US/en/product/sial/365548</a>                                                                                 |
| Picric Acid                  | Millipore Sigma     | <a href="https://www.sigmaaldrich.com/US/en/product/sigma/p6744">https://www.sigmaaldrich.com/US/en/product/sigma/p6744</a>                                                                                 |
| AEC Substrate                | Millipore Sigma     | <a href="https://www.sigmaaldrich.com/US/en/product/sigma/a5754">https://www.sigmaaldrich.com/US/en/product/sigma/a5754</a>                                                                                 |
| Liberase TL                  | Millipore Sigma     | <a href="https://www.sigmaaldrich.com/US/en/product/roche/05401020001">https://www.sigmaaldrich.com/US/en/product/roche/05401020001</a>                                                                     |
| TrypLE                       | ThermoFisher        | <a href="https://www.thermofisher.com/order/catalog/product/12605036">https://www.thermofisher.com/order/catalog/product/12605036</a>                                                                       |
| Insulin-Transferrin-Selenium | Millipore Sigma     | <a href="https://www.sigmaaldrich.com/US/en/product/sigma/i3146">https://www.sigmaaldrich.com/US/en/product/sigma/i3146</a>                                                                                 |
| ICAM-1 Fc                    | Biolegend           | <a href="https://www.biolegend.com/en-us/products/recombinant-mouse-icam-1-fc-chimera-carrier-free-9893">https://www.biolegend.com/en-us/products/recombinant-mouse-icam-1-fc-chimera-carrier-free-9893</a> |
| VCAM-1 Fc                    | Biolegend           | <a href="https://www.biolegend.com/en-us/products/recombinant-human-vcam-1-fc-chimera-carrier-free-9992">https://www.biolegend.com/en-us/products/recombinant-human-vcam-1-fc-chimera-carrier-free-9992</a> |
| CXCL10                       | Peprtech            | <a href="https://www.peprtech.com/en/recombinant-murine-ip-10-cxcl10">https://www.peprtech.com/en/recombinant-murine-ip-10-cxcl10</a>                                                                       |
| IL-2 ELISA                   | R & D               | <a href="https://www.rndsystems.com/products/mouse-il-2-duo-set-elisa_dy402">https://www.rndsystems.com/products/mouse-il-2-duo-set-elisa_dy402</a>                                                         |
| TNF $\alpha$ ELISA           | R & D               | <a href="https://www.rndsystems.com/products/mouse-tnf-alpha-duo-set-elisa_dy410">https://www.rndsystems.com/products/mouse-tnf-alpha-duo-set-elisa_dy410</a>                                               |
| IFN $\gamma$ ELISA           | R & D               | <a href="https://www.rndsystems.com/products/mouse-ifn-gamma-duo-set-elisa_dy485">https://www.rndsystems.com/products/mouse-ifn-gamma-duo-set-elisa_dy485</a>                                               |
| WGA                          | ThermFisher         | <a href="https://www.thermofisher.com/order/catalog/product/W11261">https://www.thermofisher.com/order/catalog/product/W11261</a>                                                                           |
| MyD88 Inhibitor Peptide      | NovusBio            | <a href="https://www.novusbio.com/products/myd88-inhibitor_nbp2-29328">https://www.novusbio.com/products/myd88-inhibitor_nbp2-29328</a>                                                                     |
| TUNEL Kit                    | Sigma               | <a href="https://www.sigmaaldrich.com/US/en/product/roche/12156792910">https://www.sigmaaldrich.com/US/en/product/roche/12156792910</a>                                                                     |

## ARRIVE GUIDELINES

The ARRIVE guidelines (<https://arriveguidelines.org/>) are a checklist of recommendations to improve the reporting of research involving animals. Key elements of the study design should be included below to better enable readers to scrutinize the research adequately, evaluate its methodological rigor, and reproduce the methods or findings.

## Study Design

| Groups | Sex | Age | Number (prior to experiment) | Number (after termination) | Littermates (Yes/No) | Other description |
|--------|-----|-----|------------------------------|----------------------------|----------------------|-------------------|
|--------|-----|-----|------------------------------|----------------------------|----------------------|-------------------|

DOI [to be added]

|                   |     |            |    |    |     |                                                   |
|-------------------|-----|------------|----|----|-----|---------------------------------------------------|
| WT Th1 Sham       | M   | 8-10 weeks | 6  | 6  | Yes | Adoptive Transfer 4 week time point               |
| WT Th1 TAC        | M   | 8-10 weeks | 9  | 9  | Yes | Adoptive Transfer 4 week time point               |
| MyD88 KO Th1 Sham | M   | 8-10 weeks | 5  | 5  | Yes | Adoptive Transfer 4 week time point               |
| MyD88 KO Th1 TAC  | M   | 8-10 weeks | 9  | 9  | Yes | Adoptive Transfer 4 week time point               |
| Cre- Sham         | M/F | 8-10 weeks | 7  | 7  | Yes | 4 week time point (histology)                     |
| Cre+ Sham         | M/F | 8-10 weeks | 8  | 8  | Yes | 4 week time point (histology)                     |
| Cre- TAC          | M/F | 8-10 weeks | 10 | 10 | Yes | 4 week time point (histology)                     |
| Cre+ TAC          | M/F | 8-10 weeks | 12 | 11 | Yes | 4 week time point (histology)                     |
| Cre- Sham         | M/F | 8-10 weeks | 4  | 4  | Yes | Survival                                          |
| Cre+ Sham         | M/F | 8-10 weeks | 4  | 4  | Yes | Survival                                          |
| Cre- TAC          | M/F | 8-10 weeks | 11 | 10 | Yes | Survival                                          |
| Cre+ TAC          | M/F | 8-10 weeks | 10 | 10 | Yes | Survival                                          |
| Cre- Sham         | M/F | 8-10 weeks | 8  | 8  | Yes | 4 week time point (Heart Digest / Flow cytometry) |
| Cre+ Sham         | M/F | 8-10 weeks | 7  | 6  | Yes | 4 week time point (Heart Digest / Flow cytometry) |
| Cre- TAC          | M/F | 8-10 weeks | 8  | 8  | Yes | 4 week time point (Heart Digest / Flow cytometry) |
| Cre+ TAC          | M/F | 8-10 weeks | 8  | 8  | Yes | 4 week time point (Heart Digest / Flow cytometry) |

#### Sample Size:

Our lab has previously published on multiple occasions using the TAC model (PMID: 36092510, PMID: 33463362, PMID: 33103561, PMID: 30779709), using a minimum sample size based on power calculations for the expected decrease in fractional shortening and increase in T-cell infiltration (<http://powerandsamplesize.com/Calculators/Compare-2-Means/2-Sample-Equality>), showing a minimum of 6 mice per group is needed to detect statistically significant changes with a power of 90%.

#### Inclusion Criteria:

Mice underwent TAC surgery between 8 and 10 weeks of age on littermates and/or mice aged matched between litters from the same colony.

#### Exclusion Criteria:

DOI [to be added]

1 mouse that exhibited no decrease in fractional shortening or well established hallmarks of successful TAC surgery (LV hypertrophy) were excluded from the analysis, and one additional mouse that was determined to have an inconclusive genotype after tissues were harvested. Additionally, mice that exhibited signs of euthanasia criteria post surgery (decrease in body weight, behavioral changes, signs of pain) were euthanized.

**Randomization:**

Mice were randomized to TAC vs. Sham groups from respective genotypes by a random number generator, as well as randomly received WT or MyD88 KO T-cells by adoptive transfer by a random number generator (<https://www.calculator.net/random-number-generator.html>)

**Blinding:**

Echocardiography, tissue collection, microscopy, and flow cytometric analysis were done in a blinded fashion. In short, each animal was assigned an ID number (tail tattoo) prior to surgery by a third party, and the echocardiography, tissue collection, microscopy, and flow cytometry was done only using the ID number. After all data was collected ID numbers were matched with genotypes and surgery conditions.
